# Supplementary material
Source: PubMed Central journal article supplement (PMC2864795)

# Supporting Information: Revealing Non-Covalent Interactions

Erin R. Johnson, Shahar Keinan, Paula Mori-Sánchez,  
Julia Contreras-García, Aron J. Cohen, and Weitao Yang

## 1 Other Density-Gradient Ratios

Figure S1: Plots of the ratio  $|\nabla\rho|/\rho^n$ ,  $n = \{\frac{1}{3}, \frac{2}{3}, 1, \frac{4}{3}, \frac{5}{3}\}$  versus  $\rho$  for the methane dimer. The data was obtained by evaluating B3LYP/631G\* density and gradient values on a cuboid grid with a 0.1 au increment.

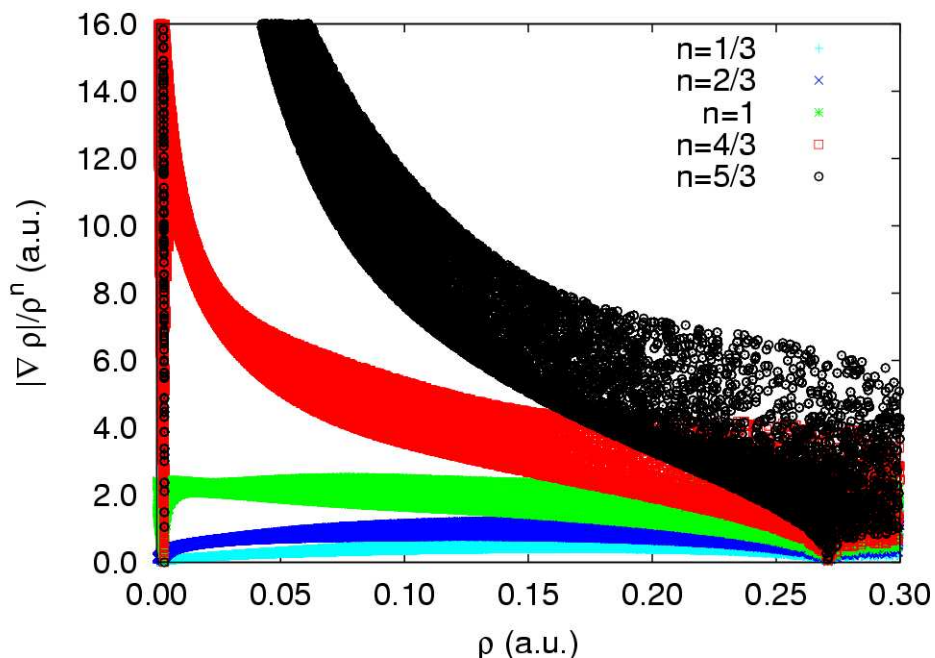

The behavior of several  $|\nabla\rho|/\rho^n$  ratios ( $n = \{\frac{1}{3}, \frac{2}{3}, 1, \frac{4}{3}, \frac{5}{3}\}$ ) is shown in Figure S1 for low density regions of the methane dimer. The reduced gradient ( $n = \frac{4}{3}$ ) has large, positive values in density tails and low values, approaching zero, for non-covalent interactions. Now consider the behavior of the  $|\nabla\rho|/\rho^n$  ratio for other exponents. If there are low powers of the density in the denominator, the ratio approaches zero for both exponential tails and non-covalent interactions. If high powers of the density are used, the ratio assumes very large values in both situations (although it will still be zero exactly at a critical point). The 4/3 power used in the reduced gradient is not the only

one that can isolate non-covalent interactions, but there is a relatively small range of acceptable values. In particular, Fig. S1 shows that the local speed ( $\frac{|\nabla\rho|}{\rho}$ ) [Bohorquez, H. J.; Boyd, R. J. *J. Chem. Phys.* **2008**, *129*, 024110.] can also be used to identify non-covalent interactions. However, it is not as discriminatory as the reduced gradient since it approaches a constant for the density tail regions.

## 2 MP2 results

Figure S2: MP2/6-311++G\*\* gradient isosurfaces with  $s = 0.5$  au for (a) bicyclo[2,2,2]octene, (b) branched octane, and the homomolecular dimers of (c) benzene, (d) methane, (e) water, and (f) formic acid. The surfaces are colored on a blue-green-red scale according to values of  $\text{sign}(\lambda_2)\rho$ , ranging from -0.04 to 0.02 au. Blue indicates strong attractive interactions and red indicates strong non-bonded overlap.

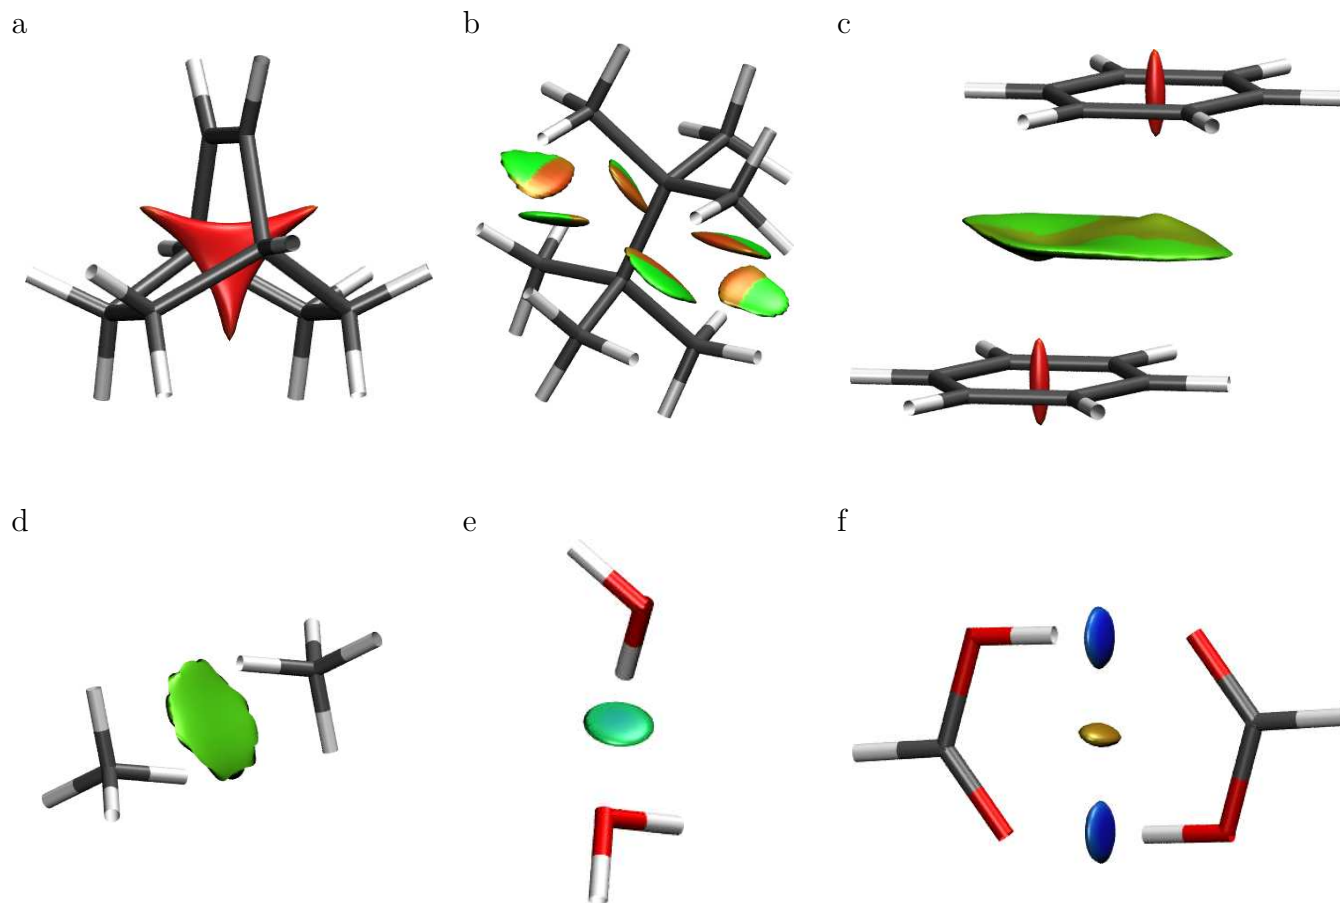

### 3 S22 results

Figure S3: B3LYP/6-31G\* gradient isosurfaces with  $s = 0.5$  au for the complexes of the s22 intermolecular interaction test set. The surfaces are colored on a blue-green-red scale according to values of  $\text{sign}(\lambda_2)\rho$ , ranging from -0.04 to 0.02 au. Blue indicates strong attractive interactions and red indicates strong non-bonded overlap.

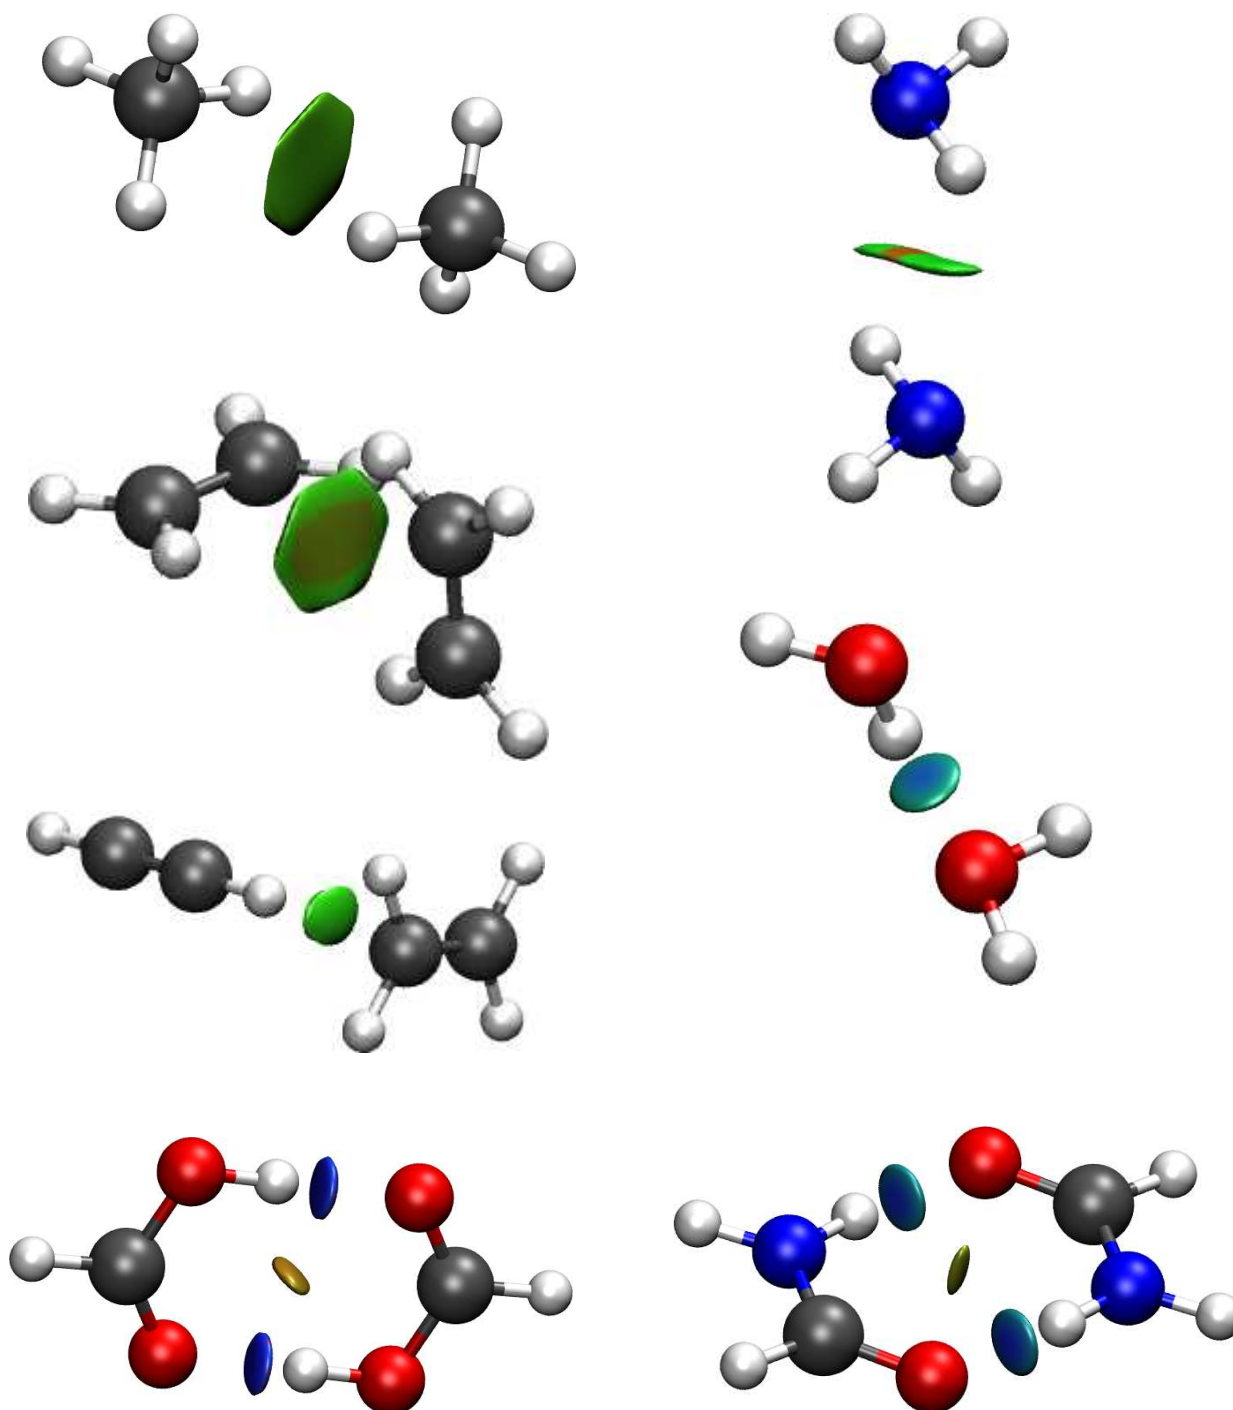

Figure S3 continued: B3LYP/6-31G\* gradient isosurfaces with  $s = 0.5$  au for the complexes of the s22 intermolecular interaction test set. The surfaces are colored on a blue-green-red scale according to values of  $\text{sign}(\lambda_2)\rho$ , ranging from -0.04 to 0.02 au. Blue indicates strong attractive interactions and red indicates strong non-bonded overlap.

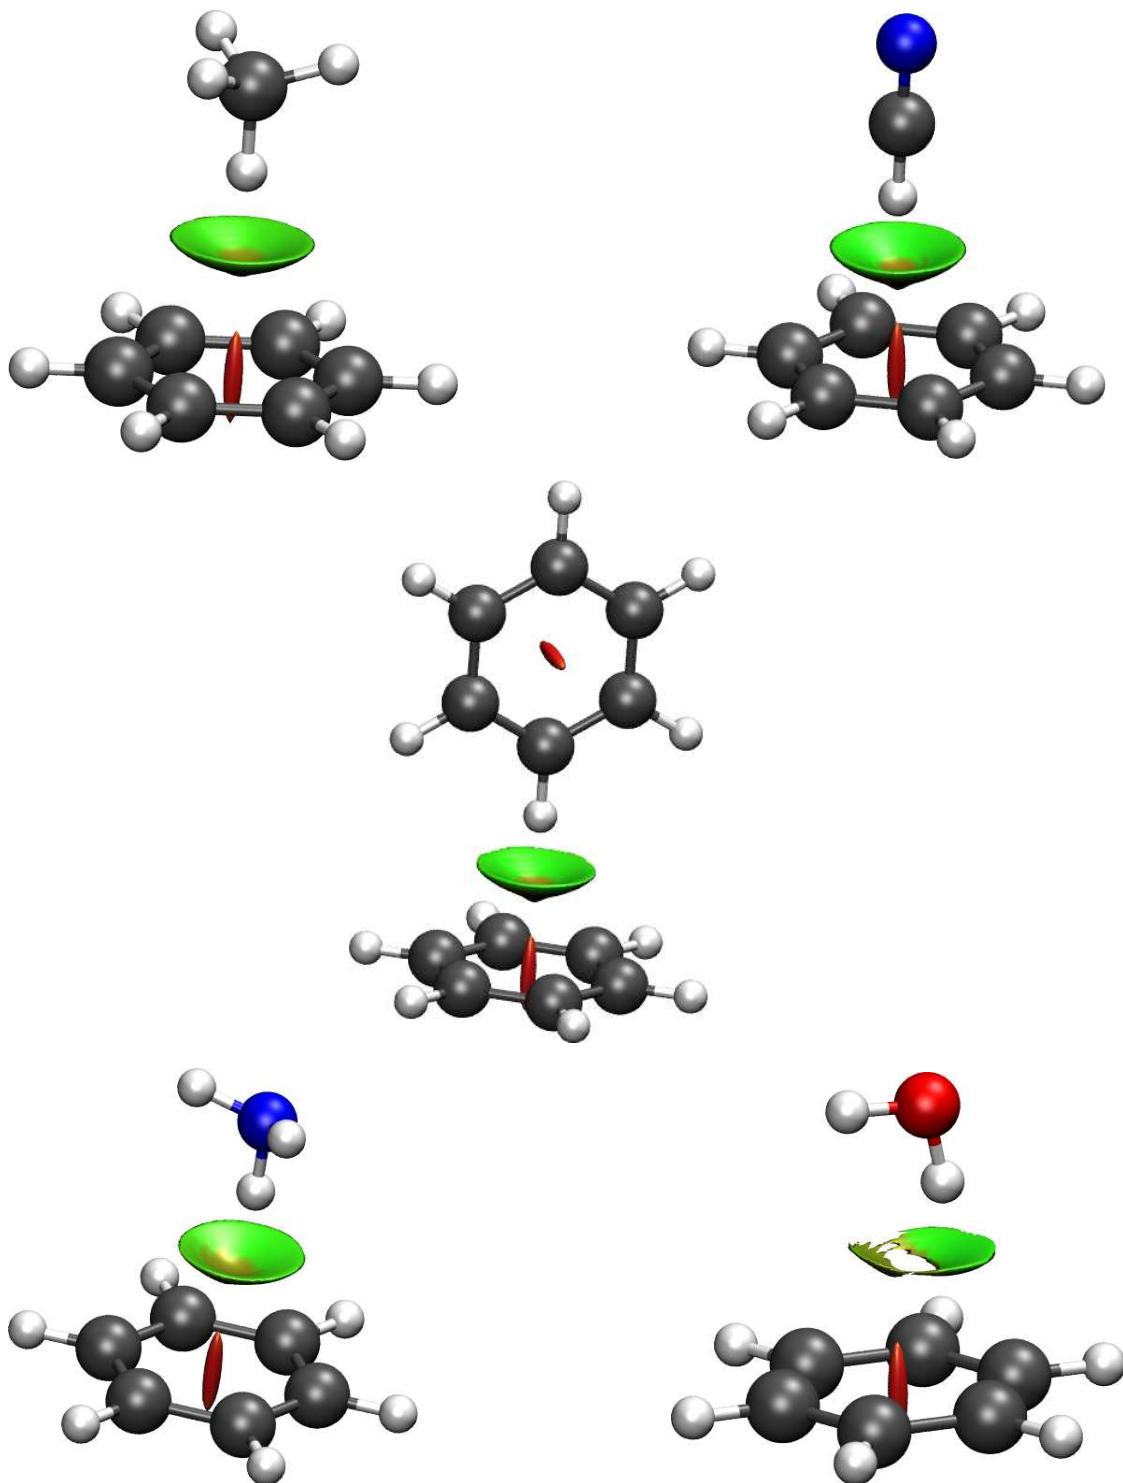

Figure S3 continued: B3LYP/6-31G\* gradient isosurfaces with  $s = 0.5$  au for the complexes of the s22 intermolecular interaction test set. The surfaces are colored on a blue-green-red scale according to values of  $\text{sign}(\lambda_2)\rho$ , ranging from -0.04 to 0.02 au. Blue indicates strong attractive interactions and red indicates strong non-bonded overlap.

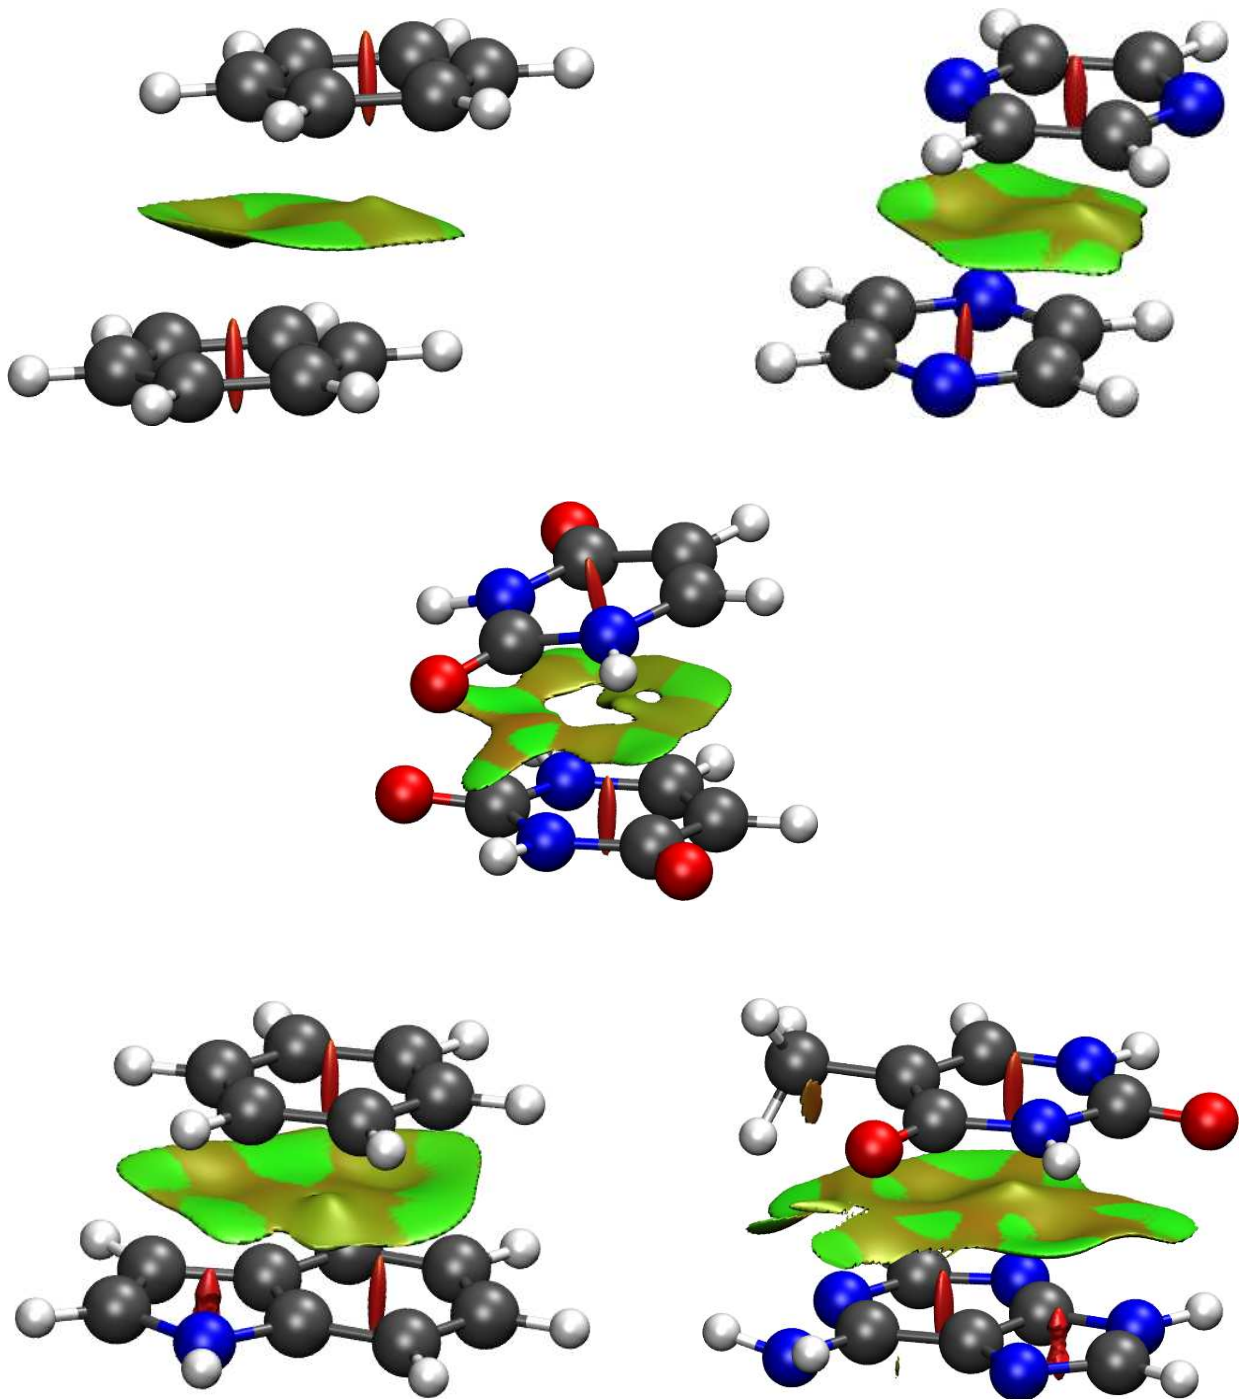

Figure S3 continued: B3LYP/6-31G\* gradient isosurfaces with  $s = 0.5$  au for the complexes of the s22 intermolecular interaction test set. The surfaces are colored on a blue-green-red scale according to values of  $\text{sign}(\lambda_2)\rho$ , ranging from -0.04 to 0.02 au. Blue indicates strong attractive interactions and red indicates strong non-bonded overlap.

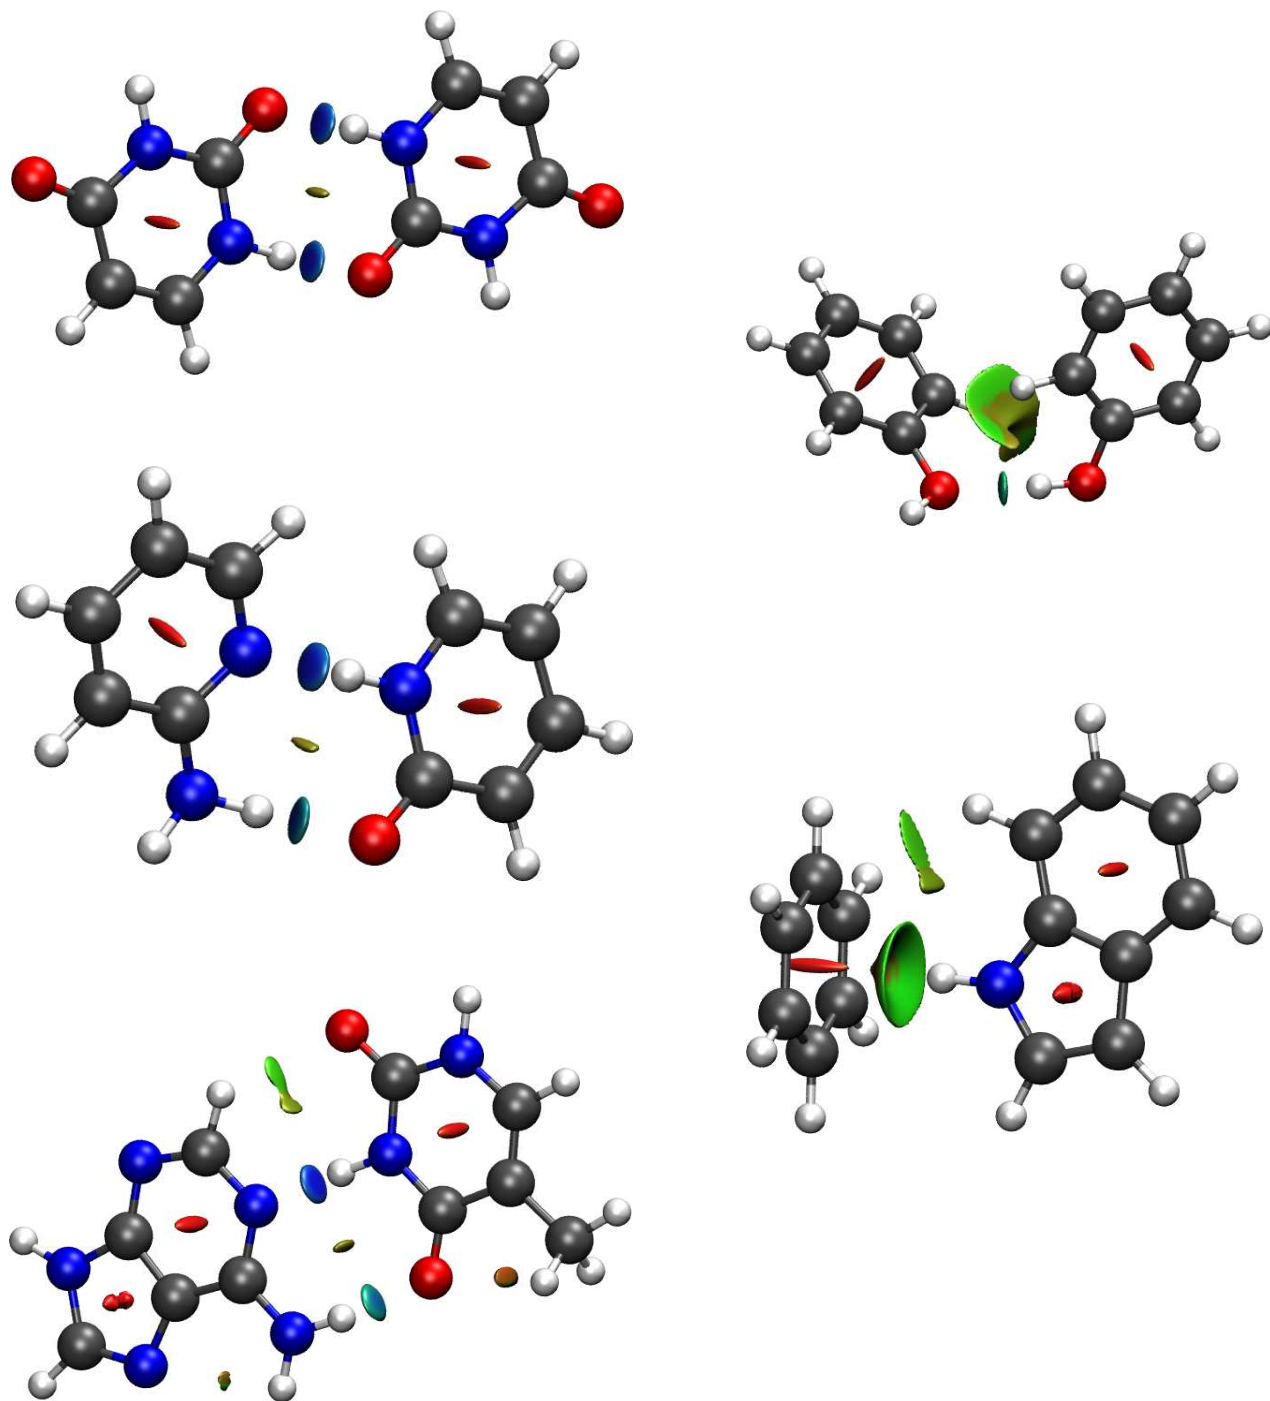

## 4 Covalent Bonding

Figure S4: B3LYP/6-31G\* gradient isosurfaces with  $s = 0.2$  au for ethane, ethylene, and acetylene. The surfaces are colored on a blue-green-red scale according to values of  $\text{sign}(\lambda_2)\rho$ , ranging from -0.5 to 0.0 au. Blue indicates strong attractive interactions.

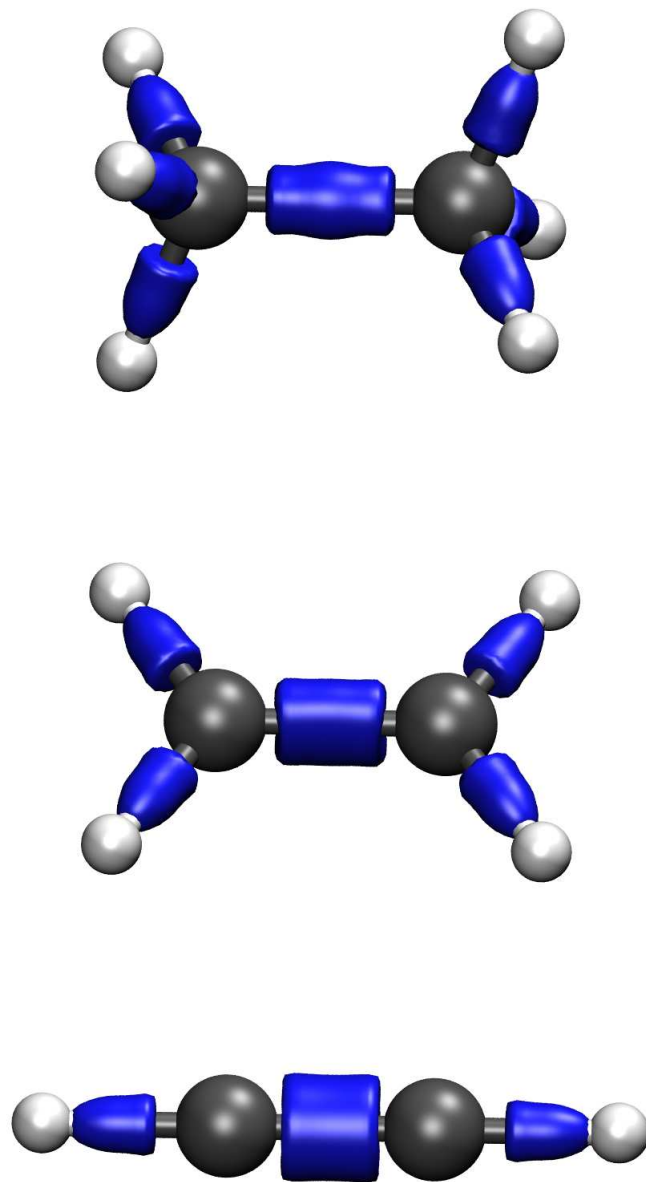

## 5 Comparison with ELF and AIM

Figure S5: The ELF= 0.9 au isosurface for benzene dimer (a) and the AIM molecular graph showing critical points and bond paths (b). An overlay of the  $s = 0.6$  au,  $\rho < 0.5$  au and  $s = 0.2$ ,  $\rho < 0.4$  isosurfaces (c) displays both non-covalent interactions and covalent bonds, colored on a blue-green-red scale according to values of  $\text{sign}(\lambda_2)\rho$ , ranging from -0.04 to 0.02 au. All results were obtained from the B3LYP/6-31G\* electron density.

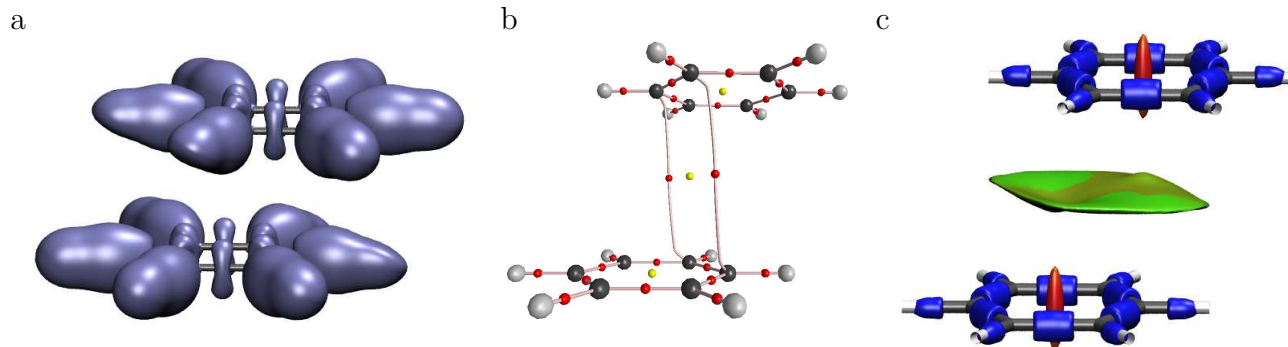



## 6 Atomic-Density Parameters

Table S1: Parameterized exponents ( $\zeta$ ) and coefficients ( $c$ ) of sphericalized atomic densities, in atomic units.

| Atom | $c_1$  | $\zeta_1$ | $c_2$   | $\zeta_2$ | $c_3$   | $\zeta_3$ |
|------|--------|-----------|---------|-----------|---------|-----------|
| H    | 0.2815 | 0.5288    | –       | –         | –       | –         |
| He   | 2.437  | 0.3379    | –       | –         | –       | –         |
| Li   | 11.84  | 0.1912    | 0.06332 | 0.9992    | –       | –         |
| Be   | 31.34  | 0.1390    | 0.3694  | 0.6945    | –       | –         |
| B    | 67.82  | 0.1059    | 0.8527  | 0.5300    | –       | –         |
| C    | 120.2  | 0.0884    | 1.172   | 0.5480    | –       | –         |
| N    | 190.9  | 0.0767    | 2.247   | 0.4532    | –       | –         |
| O    | 289.5  | 0.0669    | 2.879   | 0.3974    | –       | –         |
| F    | 406.3  | 0.0608    | 3.049   | 0.3994    | –       | –         |
| Ne   | 561.3  | 0.0549    | 6.984   | 0.3447    | –       | –         |
| Na   | 760.8  | 0.0496    | 22.42   | 0.2511    | 0.06358 | 1.0236    |
| Mg   | 1016   | 0.0449    | 37.17   | 0.2150    | 0.3331  | 0.7753    |
| Al   | 1319   | 0.0411    | 57.95   | 0.1874    | 0.8878  | 0.5962    |
| Si   | 1658   | 0.0382    | 87.16   | 0.1654    | 0.7888  | 0.6995    |
| P    | 2042   | 0.0358    | 115.7   | 0.1509    | 1.465   | 0.5851    |
| S    | 2501   | 0.0335    | 158.0   | 0.1369    | 2.170   | 0.5149    |
| Cl   | 3024   | 0.0315    | 205.5   | 0.1259    | 3.369   | 0.4974    |
| Ar   | 3625   | 0.0296    | 260.0   | 0.1168    | 5.211   | 0.4412    |

## 7 Computations using the Promolecular Density

Approximate promolecular densities were constructed (by summing exponential atomic densities) for branched octane, bicyclo[2,2,2]octene, and the homomolecular dimers of methane, benzene, water, and formic acid. It should be noted that, in order to generate the isosurfaces for bicyclo[2,2,2]octene, branched octane, and benzene dimer, lower cut-offs on the gradient (0.25-0.35 au) and higher cut-offs on the density (0.08-0.09 au) were required. This is to be expected, since the approximate promolecular densities used to generate these isosurfaces cannot adjust to alleviate Pauli repulsion in the manner of self-consistent DFT electron densities.

Figure S6: Gradient isosurfaces obtained using approximate promolecular densities. The bounds on the density and reduced gradient values (in au) are  $s^{pro} = 0.35$ ,  $\rho^{pro} < 0.05$  for branched octane,  $s^{pro} = < 0.25$ ,  $\rho^{pro} < 0.09$  for bicyclo[2,2,2]octene and benzene dimer,  $s^{pro} = 0.6$ ,  $\rho^{pro} < 0.05$  for the methane and water dimers, and  $s^{pro} = 0.5$ ,  $\rho^{pro} < 0.065$  for formic acid dimer. The surfaces are colored on a blue-green-red scale according to values of  $\text{sign}(\lambda_2)\rho^{pro}$ , ranging from -0.06 to 0.05 au. Blue indicates strong attractive interactions and red indicates strong non-bonded overlap.

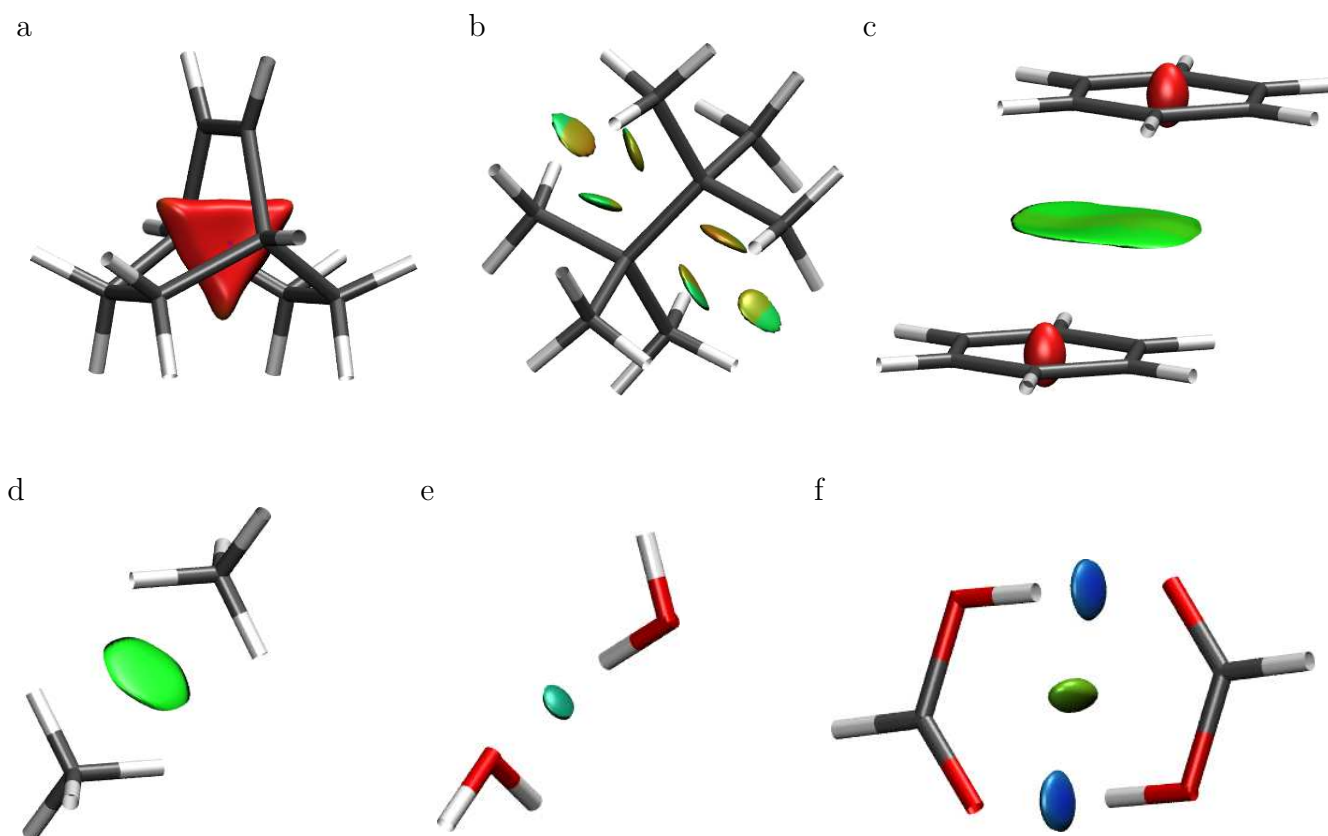

Supplement: NIHMS196958-supplement-1_si_001.pdf [file NIHMS196958-supplement-1_si_001.pdf]
