# Supplementary material
Source: PubMed Central journal article supplement (PMC2864795)
Supplement: NIHMS196958-supplement-2_si_002.pdf [file NIHMS196958-supplement-2_si_002.pdf]

# Supporting Information: Revealing Non-Covalent Interactions

Erin R. Johnson, Shahar Keinan, Paula Mori-Sánchez,  
Julia Contreras-García, Aron J. Cohen, and Weitao Yang

## 1 Gaussian Reference

Gaussian 03, Revision C.02, Frisch, M. J.; Trucks, G. W.; Schlegel, H. B.; Scuseria, G. E.; Robb, M. A.; Cheeseman, J. R.; Montgomery, Jr., J. A.; Vreven, T.; Kudin, K. N.; Burant, J. C.; Millam, J. M.; Iyengar, S. S.; Tomasi, J.; Barone, V.; Mennucci, B.; Cossi, M.; Scalmani, G.; Rega, N.; Petersson, G. A.; Nakatsuji, H.; Hada, M.; Ehara, M.; Toyota, K.; Fukuda, R.; Hasegawa, J.; Ishida, M.; Nakajima, T.; Honda, Y. Kitao, O.; Nakai, H.; Klene, M.; Li, X.; Knox, J. E.; Hratchian, H. P.; Cross, J. B.; Adamo, C.; Jaramillo, J.; Gomperts, R.; Stratmann, R. E.; Yazyev, O.; Austin, A. J.; Cammi, R.; Pomelli, C.; Ochterski, J. W.; Ayala, P. Y.; Morokuma, K.; Voth, G. A.; Salvador, P.; Dannenberg, J. J.; Zakrzewski, V. G.; Dapprich, S.; Daniels, A. D.; Strain, M. C.; Farkas, O.; Malick, D. K.; Rabuck, A. D.; Raghavachari, K.; Foresman, J. B.; Ortiz, J. V.; Cui, Q.; Baboul, A. G.; Clifford, S.; Cioslowski, J.; Stefanov, B. B.; Liu, G.; Liashenko, A.; Piskorz, P.; Komaromi, I.; Martin, R. L.; Fox, D. J.; Keith, T.; Al-Laham, M. A.; Peng, C. Y.; Nanayakkara, A.; Challacombe, M.; Gill, P. M. W.; Johnson, B.; Chen, W.; Wong, M. W.; Gonzalez, C.; Pople, J. A. Gaussian, Inc., Wallingford, CT, 2004.

## 2 Molecular Geometries

The geometries of all species considered in this work (with the exception of the 2UXO pdb file, diamond, and graphite) are given in Å Cartesian coordinates. For diamond and graphite, the space group, lattice parameters (in Å), and internal coordinates of the atoms are given.

diamond

space group: 227 (Fd $\bar{3}$ m)

lattice parameter: a = 3.5667

C position: 0.125 0.125 0.125

graphite

space group: 186 (P6<sub>3</sub>mc)

lattice parameter: a = 2.456

c = 6.696

C positions: 0 0 0  
1/3 2/3 0

ethane

|   |           |           |           |
|---|-----------|-----------|-----------|
| 6 | 0.000000  | 0.000000  | 0.765057  |
| 6 | 0.000000  | 0.000000  | -0.765057 |
| 1 | 0.000000  | 1.019538  | 1.164020  |
| 1 | -0.882946 | -0.509769 | 1.164020  |
| 1 | 0.882946  | -0.509769 | 1.164020  |
| 1 | 0.000000  | -1.019538 | -1.164020 |
| 1 | -0.882946 | 0.509769  | -1.164020 |
| 1 | 0.882946  | 0.509769  | -1.164020 |

n-octane

|   |           |           |           |
|---|-----------|-----------|-----------|
| 6 | 0.000000  | 0.766216  | 0.000000  |
| 6 | 0.000000  | -0.766216 | 0.000000  |
| 6 | -1.405575 | 1.376054  | 0.000000  |
| 6 | 1.405575  | -1.376054 | 0.000000  |
| 6 | -1.409950 | 2.908463  | 0.000000  |
| 6 | 1.409950  | -2.908463 | 0.000000  |
| 6 | -2.818879 | 3.507551  | 0.000000  |
| 6 | 2.818879  | -3.507551 | 0.000000  |
| 1 | 0.553684  | 1.129401  | 0.877215  |
| 1 | 0.553684  | 1.129401  | -0.877215 |
| 1 | -0.553684 | -1.129401 | 0.877215  |
| 1 | -0.553684 | -1.129401 | -0.877215 |
| 1 | -1.959575 | 1.012584  | 0.877049  |
| 1 | -1.959575 | 1.012584  | -0.877049 |
| 1 | 1.959575  | -1.012584 | 0.877049  |
| 1 | 1.959575  | -1.012584 | -0.877049 |
| 1 | -0.857070 | 3.271356  | -0.876735 |
| 1 | -0.857070 | 3.271356  | 0.876735  |
| 1 | 0.857070  | -3.271356 | -0.876735 |
| 1 | 0.857070  | -3.271356 | 0.876735  |
| 1 | -3.384207 | 3.189946  | 0.883382  |
| 1 | -3.384207 | 3.189946  | -0.883382 |
| 1 | 3.384207  | -3.189946 | 0.883382  |
| 1 | 3.384207  | -3.189946 | -0.883382 |
| 1 | -2.789442 | 4.601787  | 0.000000  |
| 1 | 2.789442  | -4.601787 | 0.000000  |

branched octane

|   |          |          |          |
|---|----------|----------|----------|
| 6 | 0.832643 | 1.172922 | 1.356619 |
|---|----------|----------|----------|

|   |           |           |           |
|---|-----------|-----------|-----------|
| 6 | 0.000000  | 0.000000  | 0.793403  |
| 1 | 1.898598  | 1.061219  | 1.140661  |
| 1 | 0.508191  | 2.140990  | 0.963394  |
| 1 | 0.724493  | 1.213629  | 2.445998  |
| 6 | -1.432102 | 0.134629  | 1.356619  |
| 6 | 0.599459  | -1.307551 | 1.356619  |
| 1 | -2.108247 | -0.630389 | 0.963394  |
| 1 | -1.413279 | 0.020615  | 2.445998  |
| 1 | -1.868342 | 1.113625  | 1.140661  |
| 1 | 0.688787  | -1.234243 | 2.445998  |
| 1 | -0.030256 | -2.174844 | 1.140661  |
| 1 | 1.600056  | -1.510601 | 0.963394  |
| 6 | 0.000000  | 0.000000  | -0.793403 |
| 6 | 1.432102  | 0.134629  | -1.356619 |
| 6 | -0.599459 | -1.307551 | -1.356619 |
| 6 | -0.832643 | 1.172922  | -1.356619 |
| 1 | 1.868342  | 1.113625  | -1.140661 |
| 1 | 2.108247  | -0.630389 | -0.963394 |
| 1 | 1.413279  | 0.020615  | -2.445998 |
| 1 | -1.600056 | -1.510601 | -0.963394 |
| 1 | -0.688787 | -1.234243 | -2.445998 |
| 1 | 0.030256  | -2.174844 | -1.140661 |
| 1 | -0.724493 | 1.213629  | -2.445998 |
| 1 | -1.898598 | 1.061219  | -1.140661 |
| 1 | -0.508191 | 2.140990  | -0.963394 |

bicyclo[2,2,2]octene

|   |           |           |           |
|---|-----------|-----------|-----------|
| 6 | -1.253462 | 0.777139  | -0.671382 |
| 6 | 0.000000  | 1.288932  | 0.090123  |
| 6 | 0.000000  | -1.288932 | 0.090123  |
| 6 | -1.253462 | -0.777139 | -0.671382 |
| 1 | -2.157689 | 1.166265  | -0.194861 |
| 1 | -1.238590 | 1.167834  | -1.695145 |
| 1 | -2.157689 | -1.166265 | -0.194861 |
| 1 | -1.238590 | -1.167834 | -1.695145 |
| 6 | 0.000000  | 0.667552  | 1.466672  |
| 6 | 0.000000  | -0.667552 | 1.466672  |
| 1 | 0.000000  | -2.381295 | 0.131048  |
| 1 | 0.000000  | 2.381295  | 0.131048  |
| 6 | 1.253462  | -0.777139 | -0.671382 |
| 1 | 2.157689  | -1.166265 | -0.194861 |
| 1 | 1.238590  | -1.167834 | -1.695145 |
| 6 | 1.253462  | 0.777139  | -0.671382 |
| 1 | 2.157689  | 1.166265  | -0.194861 |
| 1 | 1.238590  | 1.167834  | -1.695145 |
| 1 | 0.000000  | -1.276429 | 2.364784  |
| 1 | 0.000000  | 1.276429  | 2.364784  |

## methane dimer

|   |           |           |           |
|---|-----------|-----------|-----------|
| 6 | -0.000000 | 0.000000  | 1.807279  |
| 1 | -0.000000 | 1.026643  | 1.442400  |
| 1 | -0.889099 | -0.513322 | 1.442400  |
| 1 | -0.000000 | 0.000000  | 2.896843  |
| 1 | 0.889099  | -0.513322 | 1.442400  |
| 6 | -0.000000 | -0.000000 | -1.807279 |
| 1 | 0.889099  | 0.513322  | -1.442400 |
| 1 | -0.000000 | -0.000000 | -2.896843 |
| 1 | -0.889099 | 0.513322  | -1.442400 |
| 1 | -0.000000 | -1.026643 | -1.442400 |

## benzene dimer

|   |           |           |           |
|---|-----------|-----------|-----------|
| 6 | -1.800000 | 0.800000  | 1.391500  |
| 6 | -1.800000 | -0.405074 | 0.695750  |
| 6 | -1.800000 | -0.405074 | -0.695750 |
| 6 | -1.800000 | 0.800000  | -1.391500 |
| 6 | -1.800000 | 2.005074  | -0.695750 |
| 6 | -1.800000 | 2.005074  | 0.695750  |
| 6 | 1.800000  | -0.800000 | 1.391500  |
| 6 | 1.800000  | 0.405074  | 0.695750  |
| 6 | 1.800000  | 0.405074  | -0.695750 |
| 6 | 1.800000  | -0.800000 | -1.391500 |
| 6 | 1.800000  | -2.005074 | -0.695750 |
| 6 | 1.800000  | -2.005074 | 0.695750  |
| 1 | -1.800000 | 0.800000  | 2.471500  |
| 1 | -1.800000 | -1.340382 | 1.235750  |
| 1 | -1.800000 | -1.340382 | -1.235750 |
| 1 | -1.800000 | 0.800000  | -2.471500 |
| 1 | -1.800000 | 2.940382  | -1.235750 |
| 1 | -1.800000 | 2.940382  | 1.235750  |
| 1 | 1.800000  | -0.800000 | 2.471500  |
| 1 | 1.800000  | 1.340382  | 1.235750  |
| 1 | 1.800000  | 1.340382  | -1.235750 |
| 1 | 1.800000  | -0.800000 | -2.471500 |
| 1 | 1.800000  | -2.940382 | -1.235750 |
| 1 | 1.800000  | -2.940382 | 1.235750  |

## water dimer

|   |           |           |           |
|---|-----------|-----------|-----------|
| 8 | 1.531750  | 0.005922  | -0.120880 |
| 1 | 0.575968  | -0.005249 | 0.024966  |
| 1 | 1.906249  | -0.037561 | 0.763218  |
| 8 | -1.396226 | -0.004990 | 0.106766  |
| 1 | -1.789372 | -0.742283 | -0.371009 |
| 1 | -1.777037 | 0.777638  | -0.304264 |

formic acid dimer

|   |           |           |          |
|---|-----------|-----------|----------|
| 6 | -0.120234 | 1.914070  | 0.000000 |
| 1 | -0.167295 | 3.007018  | 0.000000 |
| 8 | -1.121857 | 1.220982  | 0.000000 |
| 8 | 1.121857  | 1.480489  | 0.000000 |
| 1 | 1.127582  | 0.489024  | 0.000000 |
| 8 | 1.121857  | -1.220982 | 0.000000 |
| 6 | 0.120234  | -1.914070 | 0.000000 |
| 8 | -1.121857 | -1.480489 | 0.000000 |
| 1 | -1.127582 | -0.489024 | 0.000000 |
| 1 | 0.167295  | -3.007018 | 0.000000 |

alpha-helix

|   |            |             |             |
|---|------------|-------------|-------------|
| 7 | 4.75399899 | -0.11621726 | 1.47081515  |
| 6 | 5.58763100 | -1.12174727 | 2.11768613  |
| 6 | 6.61609946 | -1.70588026 | 1.12884677  |
| 8 | 7.70592166 | -2.13447276 | 1.50443435  |
| 1 | 3.74460211 | -0.26030045 | 1.41313530  |
| 1 | 6.14608228 | -0.62701325 | 2.92117565  |
| 6 | 4.74288818 | -2.25118656 | 2.68889053  |
| 1 | 4.04041352 | -1.87252696 | 3.43839387  |
| 1 | 5.37338431 | -3.00916044 | 3.16511341  |
| 1 | 4.15982493 | -2.75069006 | 1.90650795  |
| 7 | 3.36104616 | 1.35954931  | -0.43366101 |
| 6 | 4.28741673 | 2.07693909  | 0.42886926  |
| 6 | 5.28310669 | 1.09344559  | 1.07359250  |
| 8 | 6.45471991 | 1.39794827  | 1.29262119  |
| 1 | 2.35876192 | 1.38962321  | -0.23736308 |
| 1 | 4.86187670 | 2.76970584  | -0.19738307 |
| 6 | 3.55118976 | 2.84379885  | 1.51768281  |
| 1 | 2.87500996 | 3.58563198  | 1.08053011  |
| 1 | 4.25703588 | 3.36843520  | 2.17052503  |
| 1 | 2.95345475 | 2.17603604  | 2.14537596  |
| 7 | 1.80093319 | -0.66577164 | -1.53283369 |
| 6 | 2.72157213 | 0.03035328  | -2.41979819 |
| 6 | 3.80124912 | 0.75344923  | -1.59159842 |
| 8 | 4.96580076 | 0.84858004  | -1.97656025 |
| 1 | 0.80919366 | -0.42183271 | -1.54061310 |
| 1 | 3.22426251 | -0.72115138 | -3.03978780 |
| 6 | 1.99303274 | 1.03334085  | -3.30083807 |
| 1 | 1.25406025 | 0.53126984  | -3.93371908 |
| 1 | 2.69723643 | 1.56366063  | -3.95165763 |
| 1 | 1.46597091 | 1.78472827  | -2.70327654 |
| 7 | 0.30785470 | -1.36188346 | 0.70900239  |
| 6 | 1.15161521 | -2.39126334 | 0.11635386  |
| 6 | 2.22313490 | -1.74262814 | -0.78089300 |
| 8 | 3.36071811 | -2.20299127 | -0.87932178 |

|   |             |             |             |
|---|-------------|-------------|-------------|
| 1 | -0.69398049 | -1.35525171 | 0.51288184  |
| 1 | 1.66890041  | -2.91137849 | 0.93100179  |
| 6 | 0.33108052  | -3.37832951 | -0.69876957 |
| 1 | -0.40422856 | -3.88828279 | -0.06753728 |
| 1 | 0.97548671  | -4.13871429 | -1.15324250 |
| 1 | -0.21253182 | -2.87899280 | -1.50801951 |
| 7 | -1.04523335 | 1.03769793  | 1.11908514  |
| 6 | -0.17847254 | 0.56023907  | 2.18809156  |
| 6 | 0.81793620  | -0.47722854 | 1.63578043  |
| 8 | 1.97396232  | -0.55911162 | 2.05287246  |
| 1 | -2.05434084 | 0.89505091  | 1.18690769  |
| 1 | 0.39998086  | 1.41512253  | 2.55807526  |
| 6 | -0.98299554 | -0.05675620 | 3.32147966  |
| 1 | -1.66328927 | 0.67994164  | 3.76205966  |
| 1 | -0.32262383 | -0.42654942 | 4.11232489  |
| 1 | -1.58704834 | -0.90077261 | 2.97332663  |
| 7 | -2.50884081 | 1.16431957  | -1.24801924 |
| 6 | -1.56667219 | 2.24291120  | -0.97735268 |
| 6 | -0.54085701 | 1.79706118  | 0.08447122  |
| 8 | 0.63476661  | 2.16046284  | 0.05200075  |
| 1 | -3.50444813 | 1.31339380  | -1.08924918 |
| 1 | -1.01880778 | 2.44988220  | -1.90358029 |
| 6 | -2.28232564 | 3.49785016  | -0.50003273 |
| 1 | -2.97635513 | 3.86265641  | -1.26359639 |
| 1 | -1.56515651 | 4.29584095  | -0.28124482 |
| 1 | -2.85707112 | 3.31012562  | 0.41308070  |
| 7 | -4.07314639 | -1.12993176 | -0.95025102 |
| 6 | -3.17694820 | -1.06287050 | -2.09664869 |
| 6 | -2.08657790 | -0.00111160 | -1.85562868 |
| 8 | -0.92878242 | -0.15275263 | -2.24751977 |
| 1 | -5.07212531 | -0.97148352 | -1.08566246 |
| 1 | -2.68099555 | -2.03624866 | -2.19340054 |
| 6 | -3.93498934 | -0.73206172 | -3.37367382 |
| 1 | -4.67926036 | -1.50400522 | -3.59529486 |
| 1 | -3.25104140 | -0.66276370 | -4.22652961 |
| 1 | -4.46100620 | 0.22528131  | -3.29205531 |
| 7 | -5.50622918 | -0.41853668 | 1.32572959  |
| 6 | -4.67263824 | -1.61090988 | 1.40268599  |
| 6 | -3.62390175 | -1.58822464 | 0.27218912  |
| 8 | -2.48061776 | -2.01463395 | 0.43174413  |
| 1 | -6.51600188 | -0.50849094 | 1.21725684  |
| 1 | -4.13829184 | -1.58602987 | 2.35966870  |
| 6 | -5.51366911 | -2.87443692 | 1.30282355  |
| 1 | -6.25511338 | -2.91390695 | 2.10845157  |
| 1 | -4.88386215 | -3.76761471 | 1.37065884  |
| 1 | -6.05492900 | -2.92368710 | 0.35169730  |
| 7 | -6.85348267 | 1.73910927  | 0.29575047  |

|   |              |             |             |
|---|--------------|-------------|-------------|
| 6 | -5.94748042  | 2.00750642  | 1.40640923  |
| 6 | -4.96663590  | 0.83204510  | 1.55101452  |
| 8 | -3.79920538  | 0.98998831  | 1.90483500  |
| 1 | -7.71547745  | 1.23289492  | 0.47300176  |
| 1 | -5.36301996  | 2.90212610  | 1.16372096  |
| 6 | -6.71277882  | 2.22386787  | 2.70273292  |
| 1 | -7.41672359  | 3.05632740  | 2.60479985  |
| 1 | -6.02621409  | 2.44903294  | 3.52505133  |
| 1 | -7.28543472  | 1.33535348  | 2.98851850  |
| 7 | -8.38757343  | 0.49349895  | -1.61626979 |
| 6 | -7.48498871  | 1.53923779  | -2.08398240 |
| 6 | -6.42361251  | 1.86135178  | -1.01135566 |
| 8 | -5.30540828  | 2.28596251  | -1.29778373 |
| 1 | -9.35692515  | 0.70117883  | -1.40563431 |
| 1 | -6.95953753  | 1.16305634  | -2.96965309 |
| 6 | -8.26009950  | 2.80261222  | -2.42549862 |
| 1 | -8.99964346  | 2.60603233  | -3.20814226 |
| 1 | -7.58736127  | 3.59106208  | -2.77969925 |
| 1 | -8.79589017  | 3.19128524  | -1.55162011 |
| 7 | -9.99105849  | -1.17282545 | -0.11678332 |
| 6 | -9.03361680  | -1.80795522 | -1.01680531 |
| 6 | -7.95574964  | -0.80984534 | -1.47784332 |
| 8 | -6.81292906  | -1.15700039 | -1.76834891 |
| 1 | -10.99431129 | -1.24212649 | -0.27846260 |
| 1 | -8.53246850  | -2.60300676 | -0.45347109 |
| 6 | -9.74158103  | -2.38222125 | -2.23485669 |
| 1 | -10.48675767 | -3.12755109 | -1.93699732 |
| 1 | -9.02745982  | -2.86273728 | -2.91225853 |
| 1 | -10.26139363 | -1.60095627 | -2.80075499 |
| 7 | 6.18427798   | -1.82287757 | -0.17546295 |
| 6 | 7.04986194   | -2.35631108 | -1.22040223 |
| 6 | 8.12281159   | -1.33418749 | -1.65152102 |
| 8 | 9.19335270   | -1.68454622 | -2.14552456 |
| 1 | 5.21105693   | -1.60702338 | -0.39128638 |
| 1 | 7.57545950   | -3.22740974 | -0.81147031 |
| 6 | 6.23597197   | -2.76767670 | -2.43954761 |
| 1 | 5.50287017   | -3.53772479 | -2.17701820 |
| 1 | 6.88417130   | -3.16877653 | -3.22595116 |
| 1 | 5.69070826   | -1.91667888 | -2.86245090 |
| 7 | 7.74267755   | -0.01080574 | -1.58168642 |
| 6 | 8.64589637   | 1.06667228  | -1.97155802 |
| 6 | 9.70860273   | 1.34676954  | -0.88744976 |
| 8 | 10.77354696  | 1.90812057  | -1.14311324 |
| 1 | 6.77803209   | 0.20987513  | -1.33325113 |
| 1 | 9.17956582   | 0.75382972  | -2.87696813 |
| 6 | 7.87254633   | 2.34919657  | -2.24633458 |
| 1 | 7.15011043   | 2.20234856  | -3.05625559 |

|   |              |             |             |
|---|--------------|-------------|-------------|
| 1 | 8.54763095   | 3.16134881  | -2.53601629 |
| 1 | 7.31907395   | 2.67925555  | -1.35993602 |
| 7 | 9.32119364   | 1.05603404  | 0.40110449  |
| 6 | 10.19109756  | 1.24653222  | 1.55103998  |
| 6 | 11.12571496  | 0.05507748  | 1.83303982  |
| 8 | 11.85579573  | 0.04319741  | 2.83157671  |
| 1 | 8.38728851   | 0.67358898  | 0.54473935  |
| 1 | 10.84421040  | 2.10119321  | 1.33820388  |
| 6 | 9.36055795   | 1.54935055  | 2.79305167  |
| 1 | 8.72110951   | 2.42386319  | 2.63172492  |
| 1 | 9.99920299   | 1.75464208  | 3.65880677  |
| 1 | 8.71350363   | 0.70340735  | 3.05102417  |
| 6 | 11.18413201  | -1.07964491 | 0.84344720  |
| 1 | 11.58949622  | -0.72553395 | -0.10691604 |
| 1 | 10.19141101  | -1.50951876 | 0.70457860  |
| 1 | 11.84224324  | -1.86355691 | 1.22964997  |
| 7 | -11.92988823 | 0.18561003  | 1.27231469  |
| 6 | -10.79036957 | -0.35515719 | 2.05426675  |
| 6 | -9.61316600  | -0.68461739 | 1.11608940  |
| 8 | -8.43331597  | -0.53517343 | 1.43144538  |
| 1 | -12.77507645 | 0.12513301  | 1.84586103  |
| 1 | -10.45414338 | 0.36955732  | 2.80590085  |
| 6 | -11.22211935 | -1.63991330 | 2.75731360  |
| 1 | -12.02918156 | -1.44533609 | 3.47246413  |
| 1 | -10.38289552 | -2.07829628 | 3.30926897  |
| 1 | -11.57232712 | -2.39644279 | 2.04529418  |
| 6 | -11.72226766 | 1.59264106  | 0.93644211  |
| 1 | -11.63803871 | 2.21010077  | 1.83628820  |
| 1 | -10.82818862 | 1.73333512  | 0.32138776  |
| 1 | -12.57781515 | 1.95539433  | 0.35888038  |

beta-sheet

|   |             |             |             |
|---|-------------|-------------|-------------|
| 7 | -1.45231726 | -2.55315573 | -0.08425553 |
| 6 | -0.19683941 | -1.83154848 | -0.11998158 |
| 6 | 0.98965185  | -2.78990905 | -0.07336086 |
| 8 | 0.85321402  | -4.00984086 | -0.00910281 |
| 1 | -1.39696059 | -3.56719429 | -0.02168213 |
| 1 | -0.15696307 | -1.24788285 | -1.04428743 |
| 1 | -0.15761625 | -1.16088417 | 0.74431867  |
| 7 | 2.21114492  | -2.16553422 | -0.11003184 |
| 6 | 3.44883595  | -2.91265279 | -0.07460941 |
| 6 | 4.65935334  | -1.98372621 | -0.17297132 |
| 8 | 4.56646538  | -0.75458854 | -0.18380715 |
| 1 | 2.25608266  | -1.14158710 | -0.15240992 |
| 1 | 3.49529421  | -3.47099038 | 0.86475727  |
| 1 | 3.45841066  | -3.61854913 | -0.91212400 |
| 7 | 5.86726192  | -2.63646170 | -0.23802694 |



|   |             |             |             |
|---|-------------|-------------|-------------|
| 6 | 7.10797152  | -1.89794674 | -0.32675325 |
| 6 | 8.32448631  | -2.81651193 | -0.43331189 |
| 8 | 8.24721242  | -4.04091951 | -0.37274106 |
| 1 | 5.92839834  | -3.65114846 | -0.22349700 |
| 1 | 7.06293168  | -1.25728631 | -1.21283825 |
| 1 | 7.20324829  | -1.27803028 | 0.56968186  |
| 7 | 9.50638998  | -2.13745881 | -0.59175300 |
| 6 | 10.77778918 | -2.80396639 | -0.74847799 |
| 6 | 11.90596373 | -1.77028353 | -0.70217553 |
| 8 | 11.84063497 | -0.67801757 | -1.26461595 |
| 1 | 9.48147393  | -1.11094031 | -0.64371415 |
| 1 | 10.88916216 | -3.55222855 | 0.04136365  |
| 1 | 10.79458516 | -3.30600062 | -1.72083725 |
| 7 | 12.99371274 | -2.12707870 | 0.06627830  |
| 6 | 14.20487437 | -1.31442449 | 0.06162510  |
| 6 | 14.10894685 | 0.03028950  | 0.79955951  |
| 8 | 15.01593993 | 0.85580370  | 0.75331165  |
| 1 | 13.03125163 | -3.04317763 | 0.49673804  |
| 1 | 14.99320594 | -1.90551990 | 0.53716325  |
| 1 | 14.48146302 | -1.11267099 | -0.97843656 |
| 7 | 12.97105039 | 0.20526397  | 1.55091734  |
| 6 | 12.66929208 | 1.44268231  | 2.25046775  |
| 6 | 11.56649943 | 2.26941752  | 1.57710362  |
| 8 | 10.99414175 | 3.18317625  | 2.16814395  |
| 1 | 12.26705080 | -0.52075799 | 1.53413394  |
| 1 | 12.32403965 | 1.16725585  | 3.25129192  |
| 1 | 13.56317876 | 2.06723646  | 2.33359253  |
| 7 | 11.30958847 | 1.96669420  | 0.26121899  |
| 6 | 10.24268587 | 2.60818189  | -0.47844943 |
| 6 | 8.98205897  | 1.74480453  | -0.39230790 |
| 8 | 9.02227727  | 0.51323188  | -0.36906328 |
| 1 | 11.77498323 | 1.17041133  | -0.17038999 |
| 1 | 10.05103303 | 3.61171958  | -0.08805696 |
| 1 | 10.54642521 | 2.67716153  | -1.52675388 |
| 7 | 7.79471683  | 2.43258543  | -0.39127446 |
| 6 | 6.52728454  | 1.73213089  | -0.33275248 |
| 6 | 5.33862202  | 2.68704497  | -0.35090555 |
| 8 | 5.46568369  | 3.90792935  | -0.41407727 |
| 1 | 7.76650534  | 3.44915460  | -0.37826522 |
| 1 | 6.46352696  | 1.06451720  | -1.19792237 |
| 1 | 6.50157781  | 1.14005286  | 0.58775160  |
| 7 | 4.12230125  | 2.05283609  | -0.29686969 |
| 6 | 2.87817520  | 2.79089744  | -0.30440741 |
| 6 | 1.67037533  | 1.85247946  | -0.28381136 |
| 8 | 1.76701045  | 0.62671797  | -0.21965987 |
| 1 | 4.08544948  | 1.02863787  | -0.24431546 |
| 1 | 2.85194347  | 3.43794062  | 0.57810549  |

|   |              |             |             |
|---|--------------|-------------|-------------|
| 1 | 2.84369655   | 3.41286323  | -1.20445562 |
| 7 | 0.46049460   | 2.49974711  | -0.33868577 |
| 6 | -0.79293770  | 1.77318728  | -0.32514728 |
| 6 | -1.98235939  | 2.72674979  | -0.40021780 |
| 8 | -1.84916943  | 3.94708698  | -0.47721503 |
| 1 | 0.40228479   | 3.51362923  | -0.39260845 |
| 1 | -0.81288347  | 1.09800117  | -1.18571447 |
| 1 | -0.84814049  | 1.19440371  | 0.60251496  |
| 7 | -3.20093110  | 2.09932700  | -0.37616331 |
| 6 | -4.44178740  | 2.83935897  | -0.44373789 |
| 6 | -5.65107670  | 1.90858138  | -0.34512001 |
| 8 | -5.55470673  | 0.68300655  | -0.27053325 |
| 1 | -3.24228307  | 1.07550644  | -0.31491392 |
| 1 | -4.46638488  | 3.56191876  | 0.37929754  |
| 1 | -4.47539953  | 3.38026087  | -1.39501984 |
| 7 | -6.86063920  | 2.55842524  | -0.35163884 |
| 6 | -8.11241452  | 1.83258006  | -0.26274955 |
| 6 | -9.30414607  | 2.78468457  | -0.27086830 |
| 8 | -9.17846253  | 4.00205972  | -0.38796392 |
| 1 | -6.92170974  | 3.57040489  | -0.42122028 |
| 1 | -8.18227681  | 1.15469504  | -1.11821209 |
| 1 | -8.11178387  | 1.25721809  | 0.66789926  |
| 7 | -5.11241031  | -2.08732934 | -0.08736409 |
| 6 | -3.87318593  | -2.83279448 | -0.08250169 |
| 6 | -2.66018126  | -1.90226548 | -0.13042308 |
| 8 | -2.75193210  | -0.67701254 | -0.20996564 |
| 1 | -5.07037120  | -1.06455552 | -0.15557280 |
| 1 | -3.83187602  | -3.44016489 | 0.82780852  |
| 1 | -3.85937279  | -3.49469014 | -0.95423579 |
| 7 | -8.77426549  | -2.46971670 | 0.07012410  |
| 6 | -7.51919451  | -1.75321668 | -0.03183450 |
| 6 | -6.33146989  | -2.71118495 | -0.01173405 |
| 8 | -6.46425680  | -3.93201762 | 0.06365320  |
| 1 | -8.72112407  | -3.48211864 | 0.14344060  |
| 1 | -7.51632340  | -1.19071307 | -0.97069308 |
| 1 | -7.44353056  | -1.06414449 | 0.81418411  |
| 7 | -12.41490859 | -2.02526371 | 0.45983214  |
| 6 | -11.19093086 | -2.74371187 | 0.18237447  |
| 6 | -9.98207947  | -1.81388659 | 0.07897106  |
| 8 | -10.07287799 | -0.58986706 | -0.01796610 |
| 1 | -12.42342999 | -1.00262792 | 0.38708301  |
| 1 | -11.02231991 | -3.47874418 | 0.97688365  |
| 1 | -11.31160039 | -3.27452992 | -0.76833477 |
| 7 | -10.51762124 | 2.15834545  | -0.13841708 |
| 6 | -11.75776151 | 2.89821485  | -0.13246982 |
| 6 | -12.95819589 | 1.99854033  | 0.16811139  |
| 8 | -12.87811752 | 0.77509162  | 0.26591589  |

|   |              |             |             |
|---|--------------|-------------|-------------|
| 1 | -10.55540637 | 1.13501605  | -0.06338232 |
| 1 | -11.69333229 | 3.68937816  | 0.62279536  |
| 1 | -11.89017350 | 3.35814799  | -1.11710812 |
| 6 | -14.75065954 | -1.79736156 | 1.00434395  |
| 6 | -13.57267325 | -2.69566658 | 0.75643793  |
| 8 | -13.65151314 | -3.91875508 | 0.81062068  |
| 1 | -15.01313286 | -1.27367388 | 0.08119068  |
| 1 | -14.50836758 | -1.07011446 | 1.78405431  |
| 7 | -14.14413103 | 2.69071462  | 0.30354989  |
| 6 | -15.38258092 | 2.01076729  | 0.58227285  |
| 1 | -14.15002647 | 3.69858742  | 0.21301992  |
| 1 | -15.58982377 | 1.29610917  | -0.21986690 |
| 1 | -15.29601355 | 1.47784907  | 1.53255347  |
| 1 | -15.60688071 | -2.39241861 | 1.33275438  |
| 1 | -16.18445681 | 2.74979261  | 0.63981095  |

DNA helix

|    |           |          |         |
|----|-----------|----------|---------|
| 15 | -5.73800  | 7.65000  | 1.88000 |
| 8  | -6.55000  | 8.71700  | 1.25100 |
| 8  | -4.90600  | 8.06100  | 3.03200 |
| 8  | -6.68700  | 6.43500  | 2.30700 |
| 6  | -6.99800  | 5.41800  | 1.33600 |
| 6  | -6.89800  | 4.04500  | 1.97200 |
| 8  | -5.55100  | 3.49600  | 1.89500 |
| 6  | -7.24000  | 3.97500  | 3.46000 |
| 8  | -7.91500  | 2.75000  | 3.71900 |
| 6  | -5.88400  | 3.94200  | 4.16800 |
| 6  | -5.19200  | 3.01100  | 3.18000 |
| 7  | -3.72500  | 3.02800  | 3.28000 |
| 6  | -3.06000  | 1.82300  | 3.25600 |
| 8  | -3.63100  | 0.75000  | 3.15400 |
| 7  | -1.69400  | 1.92300  | 3.35400 |
| 6  | -0.94700  | 3.07900  | 3.47200 |
| 8  | 0.27700   | 3.01200  | 3.55100 |
| 6  | -1.71000  | 4.30600  | 3.49100 |
| 6  | -0.98700  | 5.61000  | 3.61700 |
| 6  | -3.04300  | 4.21900  | 3.39600 |
| 15 | -9.23500  | 3.06300  | 5.27700 |
| 8  | -10.52500 | 3.44600  | 4.65900 |
| 8  | -8.79300  | 3.88800  | 6.42300 |
| 8  | -9.28500  | 1.52400  | 5.71100 |
| 6  | -8.94800  | 0.51400  | 4.74100 |
| 6  | -8.05500  | -0.53500 | 5.37200 |
| 8  | -6.64300  | -0.18900 | 5.28000 |
| 6  | -8.27600  | -0.78700 | 6.86400 |
| 8  | -8.09900  | -2.17400 | 7.12800 |
| 6  | -7.15300  | -0.01400 | 7.55800 |

|    |           |          |          |
|----|-----------|----------|----------|
| 6  | -6.05500  | -0.36500 | 6.56100  |
| 7  | -4.88600  | 0.50400  | 6.64600  |
| 6  | -4.87800  | 1.87500  | 6.75900  |
| 7  | -3.67500  | 2.37700  | 6.81400  |
| 6  | -2.83600  | 1.27300  | 6.73200  |
| 6  | -1.42000  | 1.19000  | 6.74100  |
| 8  | -0.59600  | 2.10900  | 6.82600  |
| 7  | -0.98200  | -0.12500 | 6.63700  |
| 6  | -1.80200  | -1.22300 | 6.53700  |
| 7  | -1.18800  | -2.41200 | 6.44500  |
| 7  | -3.12300  | -1.16000 | 6.52900  |
| 6  | -3.57000  | 0.10900  | 6.62800  |
| 15 | -9.25100  | -2.69800 | 8.69800  |
| 8  | -10.52500 | -3.14800 | 8.09400  |
| 8  | -9.36600  | -1.76500 | 9.84000  |
| 8  | -8.38200  | -3.97000 | 9.12900  |
| 6  | -7.52600  | -4.59400 | 8.15300  |
| 6  | -6.18000  | -4.91500 | 8.77300  |
| 8  | -5.24200  | -3.80500 | 8.66700  |
| 6  | -6.19700  | -5.24300 | 10.26500 |
| 8  | -5.23600  | -6.26000 | 10.52400 |
| 6  | -5.73500  | -3.95400 | 10.94900 |
| 6  | -4.65100  | -3.59700 | 9.94000  |
| 7  | -4.21200  | -2.19600 | 10.01600 |
| 6  | -2.86100  | -1.93600 | 9.96700  |
| 8  | -2.01900  | -2.81300 | 9.86500  |
| 7  | -2.53200  | -0.60500 | 10.04300 |
| 6  | -3.39900  | 0.46400  | 10.16000 |
| 8  | -2.95500  | 1.60800  | 10.21800 |
| 6  | -4.80100  | 0.11800  | 10.20500 |
| 6  | -5.81500  | 1.21100  | 10.33200 |
| 6  | -5.13200  | -1.17700 | 10.13200 |
| 15 | -5.91800  | -7.39800 | 12.10600 |
| 8  | -6.69100  | -8.51400 | 11.51400 |
| 8  | -6.54900  | -6.70700 | 13.25300 |
| 8  | -4.46400  | -7.91600 | 12.52500 |
| 6  | -3.41400  | -7.92100 | 11.53900 |
| 6  | -2.13100  | -7.38700 | 12.14400 |
| 8  | -2.02500  | -5.93900 | 12.03200 |
| 6  | -1.93700  | -7.65600 | 13.63700 |
| 8  | -0.56000  | -7.91400 | 13.88300 |
| 6  | -2.31400  | -6.34000 | 14.32000 |
| 6  | -1.65600  | -5.41800 | 13.30000 |
| 7  | -2.12000  | -4.03600 | 13.37400 |
| 6  | -3.41900  | -3.60300 | 13.50200 |
| 7  | -3.52300  | -2.30300 | 13.54100 |
| 6  | -2.21600  | -1.84800 | 13.43400 |

|    |          |           |          |
|----|----------|-----------|----------|
| 6  | -1.70000 | -0.52700  | 13.41700 |
| 8  | -2.31700 | 0.54200   | 13.49800 |
| 7  | -0.31500 | -0.51900  | 13.29200 |
| 6  | 0.47400  | -1.64000  | 13.19500 |
| 7  | 1.79400  | -1.42500  | 13.08000 |
| 7  | 0.00600  | -2.87600  | 13.21000 |
| 6  | -1.33800 | -2.90700  | 13.33000 |
| 15 | -0.39400 | -9.15000  | 15.46700 |
| 8  | -0.36900 | -10.50900 | 14.88100 |
| 8  | -1.29900 | -8.95700  | 16.62100 |
| 8  | 1.09100  | -8.71300  | 15.87000 |
| 6  | 1.93400  | -8.10400  | 14.87300 |
| 6  | 2.66500  | -6.91600  | 15.46700 |
| 8  | 1.89800  | -5.68200  | 15.35600 |
| 6  | 2.99400  | -7.01300  | 16.95600 |
| 8  | 4.26200  | -6.41200  | 17.18700 |
| 6  | 1.92200  | -6.16700  | 17.64500 |
| 6  | 1.90300  | -5.03800  | 16.62100 |
| 7  | 0.70700  | -4.18700  | 16.70400 |
| 6  | 0.87700  | -2.82300  | 16.63500 |
| 8  | 1.96900  | -2.29400  | 16.50900 |
| 7  | -0.28600 | -2.09700  | 16.71900 |
| 6  | -1.56900 | -2.58800  | 16.86200 |
| 8  | -2.51900 | -1.81200  | 16.92400 |
| 6  | -1.67300 | -4.02900  | 16.92800 |
| 6  | -3.02300 | -4.65300  | 17.08300 |
| 6  | -0.54500 | -4.74500  | 16.84600 |
| 15 | 5.15800  | -7.39200  | 18.76900 |
| 8  | 5.97100  | -8.47900  | 18.17900 |
| 8  | 4.32300  | -7.76200  | 19.93400 |
| 8  | 6.10600  | -6.16300  | 19.15800 |
| 6  | 6.42000  | -5.17900  | 18.15400 |
| 6  | 6.31900  | -3.78600  | 18.74300 |
| 8  | 4.97300  | -3.23900  | 18.64400 |
| 6  | 6.65700  | -3.66600  | 20.22900 |
| 8  | 7.33200  | -2.43300  | 20.44900 |
| 6  | 5.29900  | -3.60800  | 20.93200 |
| 6  | 4.61100  | -2.71000  | 19.91100 |
| 7  | 3.15400  | -2.72300  | 20.00700 |
| 6  | 2.34300  | -3.82300  | 20.16100 |
| 7  | 1.07500  | -3.51900  | 20.21600 |
| 6  | 1.04500  | -2.13600  | 20.09100 |
| 6  | -0.05100 | -1.23700  | 20.07900 |
| 8  | -1.25800 | -1.49300  | 20.18200 |
| 7  | 0.36700  | 0.08100   | 19.93100 |
| 6  | 1.67500  | 0.48200   | 19.80800 |
| 7  | 1.87700  | 1.80200   | 19.67300 |

|    |          |          |          |
|----|----------|----------|----------|
| 7  | 2.70600  | -0.34500 | 19.81800 |
| 6  | 2.32200  | -1.63100 | 19.96100 |
| 15 | -5.90600 | 7.84200  | 21.19400 |
| 8  | -6.68400 | 8.94800  | 21.79600 |
| 8  | -6.53400 | 7.15800  | 20.04200 |
| 8  | -4.45400 | 8.37000  | 20.77900 |
| 6  | -3.40300 | 8.37200  | 21.76500 |
| 6  | -2.11900 | 7.84900  | 21.15500 |
| 8  | -2.00600 | 6.40000  | 21.25500 |
| 6  | -1.92700 | 8.13200  | 19.66400 |
| 8  | -0.55000 | 8.39900  | 19.42000 |
| 6  | -2.29800 | 6.82100  | 18.97000 |
| 6  | -1.63500 | 5.89300  | 19.98200 |
| 7  | -2.09600 | 4.50000  | 19.89500 |
| 6  | -1.13800 | 3.48500  | 19.94900 |
| 8  | 0.05700  | 3.79400  | 20.06600 |
| 7  | -1.53600 | 2.19400  | 19.87100 |
| 6  | -2.83300 | 1.90400  | 19.74500 |
| 7  | -3.18100 | 0.61600  | 19.67100 |
| 6  | -3.83100 | 2.91900  | 19.68800 |
| 6  | -3.42200 | 4.19100  | 19.76600 |
| 15 | -0.39900 | 9.59400  | 17.85300 |
| 8  | -0.37800 | 10.94600 | 18.45200 |
| 8  | -1.29900 | 9.41100  | 16.69100 |
| 8  | 1.08700  | 9.15900  | 17.45300 |
| 6  | 1.92500  | 8.54100  | 18.44900 |
| 6  | 2.65800  | 7.35800  | 17.84800 |
| 8  | 1.89100  | 6.12400  | 17.94200 |
| 6  | 2.99600  | 7.46900  | 16.36100 |
| 8  | 4.26500  | 6.86900  | 16.13100 |
| 6  | 1.92800  | 6.63100  | 15.65800 |
| 6  | 1.90200  | 5.49200  | 16.67100 |
| 7  | 0.71600  | 4.64700  | 16.57400 |
| 6  | -0.59000 | 5.05000  | 16.42900 |
| 7  | -1.44500 | 4.05800  | 16.37000 |
| 6  | -0.64900 | 2.92500  | 16.48500 |
| 6  | -0.95400 | 1.55300  | 16.49400 |
| 7  | -2.19200 | 1.06800  | 16.38200 |
| 7  | 0.07300  | 0.68500  | 16.62400 |
| 6  | 1.31300  | 1.17200  | 16.73700 |
| 7  | 1.72700  | 2.43800  | 16.74200 |
| 6  | 0.68400  | 3.27400  | 16.61100 |
| 15 | 5.10400  | 7.86000  | 14.56200 |
| 8  | 5.90500  | 8.94800  | 15.16600 |
| 8  | 4.27900  | 8.23400  | 13.39100 |
| 8  | 6.06200  | 6.63900  | 14.17600 |
| 6  | 6.37200  | 5.65000  | 15.17700 |

|    |          |          |          |
|----|----------|----------|----------|
| 6  | 6.28300  | 4.26100  | 14.58000 |
| 8  | 4.93800  | 3.70600  | 14.66200 |
| 6  | 6.63600  | 4.15000  | 13.09600 |
| 8  | 7.32000  | 2.92100  | 12.87600 |
| 6  | 5.28700  | 4.09000  | 12.38000 |
| 6  | 4.59200  | 3.18300  | 13.38900 |
| 7  | 3.12700  | 3.19000  | 13.27700 |
| 6  | 2.45700  | 1.96500  | 13.33200 |
| 8  | 3.11800  | 0.92600  | 13.47100 |
| 7  | 1.10700  | 1.94400  | 13.23200 |
| 6  | 0.43300  | 3.08600  | 13.08200 |
| 7  | -0.89800 | 3.01800  | 12.98600 |
| 6  | 1.09000  | 4.34800  | 13.02300 |
| 6  | 2.42600  | 4.35400  | 13.12400 |
| 15 | 8.53000  | 3.13100  | 11.32700 |
| 8  | 9.81200  | 3.53600  | 11.94400 |
| 8  | 8.09800  | 3.91800  | 10.15000 |
| 8  | 8.58300  | 1.57900  | 10.94500 |
| 6  | 8.23700  | 0.60200  | 11.94500 |
| 6  | 7.34900  | -0.46800 | 11.33900 |
| 8  | 5.93700  | -0.12000 | 11.40600 |
| 6  | 7.58500  | -0.77000 | 9.86000  |
| 8  | 7.41100  | -2.16500 | 9.64100  |
| 6  | 6.47000  | -0.02100 | 9.13000  |
| 6  | 5.36100  | -0.33800 | 10.12700 |
| 7  | 4.19300  | 0.52800  | 10.00100 |
| 6  | 4.17400  | 1.89200  | 9.84100  |
| 7  | 2.96800  | 2.39700  | 9.75700  |
| 6  | 2.13500  | 1.29200  | 9.86900  |
| 6  | 0.73600  | 1.15700  | 9.85600  |
| 7  | -0.10600 | 2.18300  | 9.71800  |
| 7  | 0.22600  | -0.08700 | 9.99000  |
| 6  | 1.07100  | -1.11400 | 10.12800 |
| 7  | 2.40100  | -1.11600 | 10.15600 |
| 6  | 2.87700  | 0.13300  | 10.02000 |
| 15 | 8.63900  | -2.67200 | 8.09800  |
| 8  | 9.91100  | -3.09100 | 8.72800  |
| 8  | 8.75900  | -1.78500 | 6.92000  |
| 8  | 7.78000  | -3.96500 | 7.71000  |
| 6  | 6.91900  | -4.55500 | 8.70300  |
| 6  | 5.58100  | -4.90700 | 8.08600  |
| 8  | 4.63600  | -3.79900 | 8.14200  |
| 6  | 5.61100  | -5.29200 | 6.60700  |
| 8  | 4.65600  | -6.32500 | 6.38200  |
| 6  | 5.14800  | -4.03500 | 5.87000  |
| 6  | 4.05400  | -3.64400 | 6.85600  |
| 7  | 3.60900  | -2.25000 | 6.72300  |

|    |          |          |         |
|----|----------|----------|---------|
| 6  | 2.23700  | -1.99100 | 6.75100 |
| 8  | 1.45000  | -2.94100 | 6.88700 |
| 7  | 1.80100  | -0.71600 | 6.63000 |
| 6  | 2.68100  | 0.27700  | 6.48500 |
| 7  | 2.20600  | 1.52100  | 6.36800 |
| 6  | 4.08500  | 0.04200  | 6.45300 |
| 6  | 4.50100  | -1.22500 | 6.57400 |
| 15 | 5.25700  | -7.42600 | 4.85400 |
| 8  | 6.02800  | -8.51400 | 5.49600 |
| 8  | 5.89200  | -6.78400 | 3.68100 |
| 8  | 3.80400  | -7.96100 | 4.45200 |
| 6  | 2.75100  | -7.92400 | 5.43400 |
| 6  | 1.47000  | -7.41700 | 4.80100 |
| 8  | 1.36300  | -5.96600 | 4.85100 |
| 6  | 1.28100  | -7.75000 | 3.32200 |
| 8  | -0.09600 | -8.01800 | 3.08200 |
| 6  | 1.66100  | -6.46500 | 2.58500 |
| 6  | 0.99900  | -5.49900 | 3.56000 |
| 7  | 1.46300  | -4.12200 | 3.42900 |
| 6  | 2.75800  | -3.68300 | 3.28600 |
| 7  | 2.86600  | -2.38100 | 3.19000 |
| 6  | 1.55600  | -1.93000 | 3.27500 |
| 6  | 0.99500  | -0.64200 | 3.23900 |
| 7  | 1.71300  | 0.47500  | 3.10200 |
| 7  | -0.34800 | -0.53900 | 3.34900 |
| 6  | -1.06600 | -1.65900 | 3.48700 |
| 7  | -0.65600 | -2.92500 | 3.53500 |
| 6  | 0.68100  | -2.99200 | 3.42200 |
| 1  | -8.05800 | 5.57800  | 0.94818 |
| 1  | -6.25602 | 5.48539  | 0.47314 |
| 1  | -7.66642 | 3.46091  | 1.36540 |
| 1  | -7.89792 | 4.84154  | 3.80037 |
| 1  | -5.39212 | 4.96912  | 4.21964 |
| 1  | -5.88337 | 3.62215  | 5.26221 |
| 1  | -5.51532 | 1.93818  | 3.39002 |
| 1  | -1.14105 | 0.99254  | 3.33689 |
| 1  | -1.74398 | 6.45845  | 3.69898 |
| 1  | -0.33287 | 5.59301  | 4.55050 |
| 1  | -0.33318 | 5.77204  | 2.69729 |
| 1  | -3.62704 | 5.15279  | 3.41151 |
| 1  | -9.90335 | 0.01905  | 4.36425 |
| 1  | -8.39513 | 1.00109  | 3.87113 |
| 1  | -8.34005 | -1.46111 | 4.77144 |
| 1  | -9.31459 | -0.47154 | 7.21244 |
| 1  | -7.35810 | 1.10634  | 7.60672 |
| 1  | -6.95428 | -0.26775 | 8.65149 |
| 1  | -5.68412 | -1.42217 | 6.77182 |



|   |          |          |          |
|---|----------|----------|----------|
| 1 | -5.79343 | 2.48630  | 6.79895  |
| 1 | 0.08670  | -0.29727 | 6.63460  |
| 1 | -0.10682 | -2.46484 | 6.45234  |
| 1 | -1.77367 | -3.31872 | 6.36341  |
| 1 | -8.01194 | -5.55768 | 7.78587  |
| 1 | -7.37387 | -3.87969 | 7.27766  |
| 1 | -5.87104 | -5.83407 | 8.17346  |
| 1 | -7.21925 | -5.59689 | 10.62467 |
| 1 | -6.55873 | -3.16776 | 11.00281 |
| 1 | -5.41378 | -4.03810 | 12.03957 |
| 1 | -3.72764 | -4.23373 | 10.14389 |
| 1 | -1.47655 | -0.36717 | 10.00728 |
| 1 | -6.86312 | 0.76561  | 10.28025 |
| 1 | -5.67716 | 1.74285  | 11.33087 |
| 1 | -5.67723 | 1.95744  | 9.48144  |
| 1 | -6.20034 | -1.44298 | 10.16663 |
| 1 | -3.24388 | -8.98762 | 11.17432 |
| 1 | -3.71950 | -7.25691 | 10.66421 |
| 1 | -1.34753 | -7.95164 | 11.53823 |
| 1 | -2.55302 | -8.54119 | 14.00653 |
| 1 | -3.44193 | -6.18760 | 14.38434 |
| 1 | -1.99446 | -6.21514 | 15.40715 |
| 1 | -0.53278 | -5.39009 | 13.49284 |
| 1 | -4.28274 | -4.28364 | 13.56510 |
| 1 | 0.17936  | 0.44376  | 13.26938 |
| 1 | 2.17855  | -0.41318 | 13.06797 |
| 1 | 2.47394  | -2.26344 | 12.99929 |
| 1 | 2.69436  | -8.86874 | 14.50336 |
| 1 | 1.28817  | -7.74908 | 14.00321 |
| 1 | 3.62582  | -6.91572 | 14.85346 |
| 1 | 3.01940  | -8.08941 | 17.33055 |
| 1 | 0.92046  | -6.70629 | 17.72045 |
| 1 | 2.11724  | -5.87388 | 18.72923 |
| 1 | 2.79694  | -4.35411 | 16.80203 |
| 1 | -0.18586 | -1.02038 | 16.66739 |
| 1 | -2.92105 | -5.78837 | 17.07129 |
| 1 | -3.48262 | -4.32306 | 18.07269 |
| 1 | -3.69472 | -4.32322 | 16.22298 |
| 1 | -0.62190 | -5.84273 | 16.89481 |
| 1 | 7.48093  | -5.35228 | 17.77452 |
| 1 | 5.68018  | -5.27505 | 17.29200 |
| 1 | 7.08946  | -3.22330 | 18.11901 |
| 1 | 7.31346  | -4.52113 | 20.59969 |
| 1 | 4.80584  | -4.63231 | 21.01680 |
| 1 | 5.29557  | -3.25170 | 22.01488 |
| 1 | 4.93489  | -1.63092 | 20.08503 |
| 1 | 2.72426  | -4.85406 | 20.23072 |

|   |          |          |          |
|---|----------|----------|----------|
| 1 | -0.39584 | 0.84878  | 19.91123 |
| 1 | 1.03369  | 2.48067  | 19.66588 |
| 1 | 2.88323  | 2.18795  | 19.57123 |
| 1 | -3.23747 | 9.43643  | 22.13809 |
| 1 | -3.70484 | 7.69980  | 22.63485 |
| 1 | -1.33762 | 8.41185  | 21.76511 |
| 1 | -2.54738 | 9.01731  | 19.30212 |
| 1 | -3.42524 | 6.66389  | 18.90480 |
| 1 | -1.97844 | 6.70711  | 17.88165 |
| 1 | -0.51170 | 5.87290  | 19.78862 |
| 1 | -2.42072 | -0.15339 | 19.71366 |
| 1 | -4.22320 | 0.34196  | 19.56839 |
| 1 | -4.89813 | 2.66668  | 19.58375 |
| 1 | -4.16575 | 5.00248  | 19.72562 |
| 1 | 2.68397  | 9.30209  | 18.82887 |
| 1 | 1.27502  | 8.17907  | 19.31279 |
| 1 | 3.61464  | 7.35139  | 18.46800 |
| 1 | 3.02452  | 8.54907  | 15.99737 |
| 1 | 0.92736  | 7.17185  | 15.58186 |
| 1 | 2.12945  | 6.34816  | 14.57217 |
| 1 | 2.79632  | 4.80916  | 16.48792 |
| 1 | -0.89031 | 6.10802  | 16.36804 |
| 1 | -3.03075 | 1.74419  | 16.27676 |
| 1 | -2.35761 | -0.00166 | 16.39637 |
| 1 | 2.10775  | 0.41647  | 16.84109 |
| 1 | 7.42874  | 5.82609  | 15.56673 |
| 1 | 5.62390  | 5.73741  | 16.03275 |
| 1 | 7.04990  | 3.69949  | 15.20943 |
| 1 | 7.29194  | 5.01012  | 12.73609 |
| 1 | 4.79028  | 5.11264  | 12.29592 |
| 1 | 5.29627  | 3.73958  | 11.29523 |
| 1 | 4.92259  | 2.10639  | 13.21229 |
| 1 | -1.39552 | 2.05764  | 13.03069 |
| 1 | -1.47878 | 3.92327  | 12.86354 |
| 1 | 0.52165  | 5.28338  | 12.89908 |
| 1 | 2.96831  | 5.31188  | 13.08313 |
| 1 | 9.18859  | 0.11985  | 12.34699 |
| 1 | 7.67657  | 1.11718  | 12.79359 |
| 1 | 7.62794  | -1.37370 | 11.97263 |
| 1 | 8.62712  | -0.46663 | 9.51136  |
| 1 | 6.67626  | 1.09703  | 9.04592  |
| 1 | 6.28220  | -0.31150 | 8.04375  |
| 1 | 4.99038  | -1.40112 | 9.94807  |
| 1 | 5.08796  | 2.50453  | 9.78820  |
| 1 | 0.27951  | 3.18850  | 9.60774  |
| 1 | -1.17455 | 2.00980  | 9.71631  |
| 1 | 0.59672  | -2.10250 | 10.23395 |

|   |          |          |         |
|---|----------|----------|---------|
| 1 | 7.40680  | -5.50092 | 9.11152 |
| 1 | 6.75605  | -3.80772 | 9.54835 |
| 1 | 5.27283  | -5.80428 | 8.71808 |
| 1 | 6.63789  | -5.65294 | 6.26815 |
| 1 | 5.96803  | -3.24699 | 5.79131 |
| 1 | 4.83557  | -4.16408 | 4.78127 |
| 1 | 3.13563  | -4.29301 | 6.66896 |
| 1 | 1.13821  | 1.69718  | 6.39244 |
| 1 | 2.88913  | 2.35223  | 6.24882 |
| 1 | 4.80113  | 0.87034  | 6.33335 |
| 1 | 5.58011  | -1.44498 | 6.55312 |
| 1 | 2.57986  | -8.97390 | 5.84391 |
| 1 | 3.05315  | -7.22313 | 6.28081 |
| 1 | 0.68443  | -7.95593 | 5.42713 |
| 1 | 1.89748  | -8.65080 | 2.99319 |
| 1 | 2.78926  | -6.31564 | 2.51934 |
| 1 | 1.34593  | -6.38767 | 1.49214 |
| 1 | -0.12321 | -5.47795 | 3.36050 |
| 1 | 3.62414  | -4.36281 | 3.25503 |
| 1 | 2.79019  | 0.41829  | 3.01116 |
| 1 | 1.21805  | 1.43751  | 3.08175 |
| 1 | -2.15434 | -1.51294 | 3.57349 |

A-T base pair

|   |             |             |             |
|---|-------------|-------------|-------------|
| 7 | -4.21200000 | -2.19600000 | 10.01600000 |
| 6 | -2.86100000 | -1.93600000 | 9.96700000  |
| 8 | -2.01900000 | -2.81300000 | 9.86500000  |
| 7 | -2.53200000 | -0.60500000 | 10.04300000 |
| 6 | -3.39900000 | 0.46400000  | 10.16000000 |
| 8 | -2.95500000 | 1.60800000  | 10.21800000 |
| 6 | -4.80100000 | 0.11800000  | 10.20500000 |
| 6 | -5.13200000 | -1.17700000 | 10.13200000 |
| 7 | 4.19300000  | 0.52800000  | 10.00100000 |
| 6 | 4.17400000  | 1.89200000  | 9.84100000  |
| 7 | 2.96800000  | 2.39700000  | 9.75700000  |
| 6 | 2.13500000  | 1.29200000  | 9.86900000  |
| 6 | 0.73600000  | 1.15700000  | 9.85600000  |
| 7 | -0.10600000 | 2.18300000  | 9.71800000  |
| 7 | 0.22600000  | -0.08700000 | 9.99000000  |
| 6 | 1.07100000  | -1.11400000 | 10.12800000 |
| 7 | 2.40100000  | -1.11600000 | 10.15600000 |
| 6 | 2.87700000  | 0.13300000  | 10.02000000 |
| 1 | -1.47655000 | -0.36717000 | 10.00728000 |
| 1 | -6.20034000 | -1.44298000 | 10.16663000 |
| 1 | 5.08796000  | 2.50453000  | 9.78820000  |
| 1 | 0.27951000  | 3.18850000  | 9.60774000  |
| 1 | -1.17455000 | 2.00980000  | 9.71631000  |

|   |             |             |             |
|---|-------------|-------------|-------------|
| 1 | 0.59672000  | -2.10250000 | 10.23395000 |
| 1 | -4.51061196 | -3.14897347 | 9.96430408  |
| 1 | -5.52609884 | 0.89959076  | 10.29581613 |
| 1 | 4.99328989  | -0.06536562 | 10.08733264 |

C-G base pair

|   |             |             |             |
|---|-------------|-------------|-------------|
| 7 | -2.12000000 | -4.03600000 | 13.37400000 |
| 6 | -3.41900000 | -3.60300000 | 13.50200000 |
| 7 | -3.52300000 | -2.30300000 | 13.54100000 |
| 6 | -2.21600000 | -1.84800000 | 13.43400000 |
| 6 | -1.70000000 | -0.52700000 | 13.41700000 |
| 8 | -2.31700000 | 0.54200000  | 13.49800000 |
| 7 | -0.31500000 | -0.51900000 | 13.29200000 |
| 6 | 0.47400000  | -1.64000000 | 13.19500000 |
| 7 | 1.79400000  | -1.42500000 | 13.08000000 |
| 7 | 0.00600000  | -2.87600000 | 13.21000000 |
| 6 | -1.33800000 | -2.90700000 | 13.33000000 |
| 7 | 3.12700000  | 3.19000000  | 13.27700000 |
| 6 | 2.45700000  | 1.96500000  | 13.33200000 |
| 8 | 3.11800000  | 0.92600000  | 13.47100000 |
| 7 | 1.10700000  | 1.94400000  | 13.23200000 |
| 6 | 0.43300000  | 3.08600000  | 13.08200000 |
| 7 | -0.89800000 | 3.01800000  | 12.98600000 |
| 6 | 1.09000000  | 4.34800000  | 13.02300000 |
| 6 | 2.42600000  | 4.35400000  | 13.12400000 |
| 1 | -4.28274000 | -4.28364000 | 13.56510000 |
| 1 | 0.17936000  | 0.44376000  | 13.26938000 |
| 1 | 2.17855000  | -0.41318000 | 13.06797000 |
| 1 | 2.47394000  | -2.26344000 | 12.99929000 |
| 1 | -1.39552000 | 2.05764000  | 13.03069000 |
| 1 | -1.47878000 | 3.92327000  | 12.86354000 |
| 1 | 0.52165000  | 5.28338000  | 12.89908000 |
| 1 | 2.96831000  | 5.31188000  | 13.08313000 |
| 1 | 4.12407909  | 3.18523580  | 13.35322721 |
| 1 | -1.80212437 | -4.98277613 | 13.32330432 |
